# Supplementary material for: The description and validation of the computationally Efficient CH 4 –CO–OH (ECCOHv1.01) chemistry module for 3-D model applications
Source: Copernicus journal article supplement (doi:10.5194/gmd-9-799-2016), 2016-02-26

# Ice in Caspian Sea- Gary (06/28/2013)

OSTIA dataset Sea-ice fraction, Jan. 2013

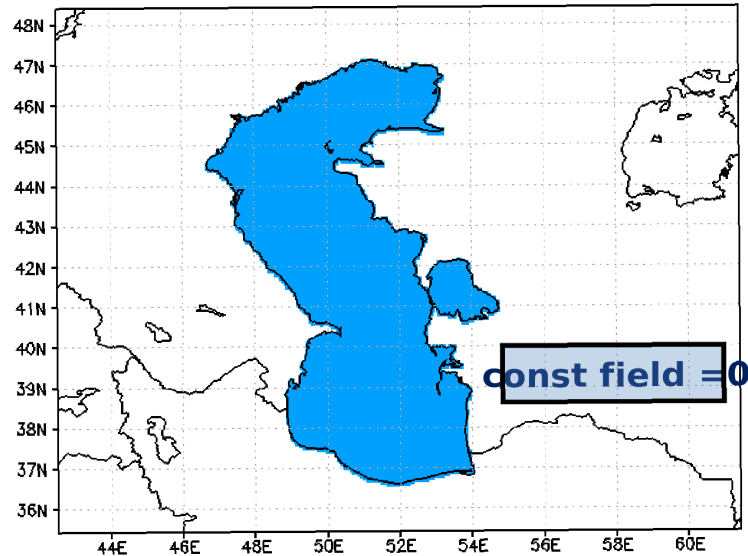

COLA/IGES

d591\_fpit Sea-ice fraction X 10(3), Jan. 2013

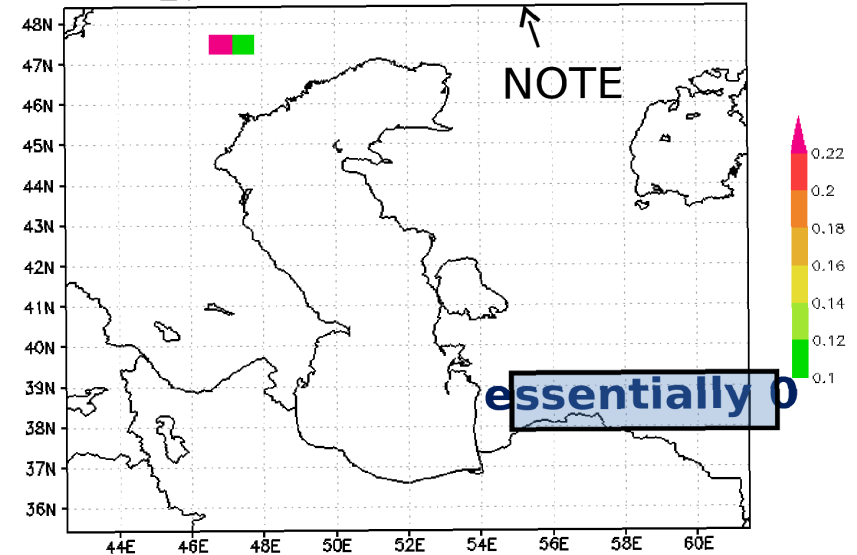

GRADS: COLA/IGES

ECMWF Sea-ice fraction, Jan. 2013

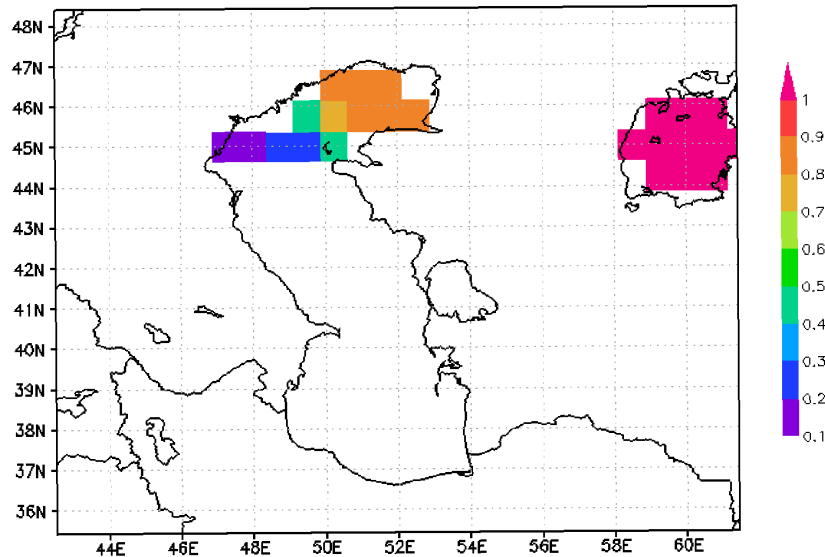

NCEP Sea-ice fraction, Jan. 2013

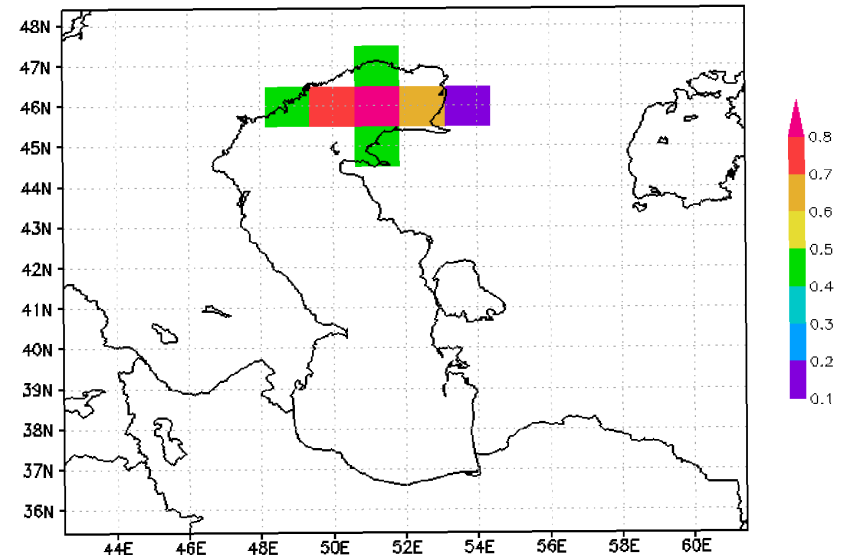

# Ice in Caspian Sea- data

From 1x1 deg weekly Reynolds:

<http://www.esrl.noaa.gov/psd/data/gridded/data.noaa.oisst.v2.html>

Monthly mean of Jan 2013 ice concentration (%)

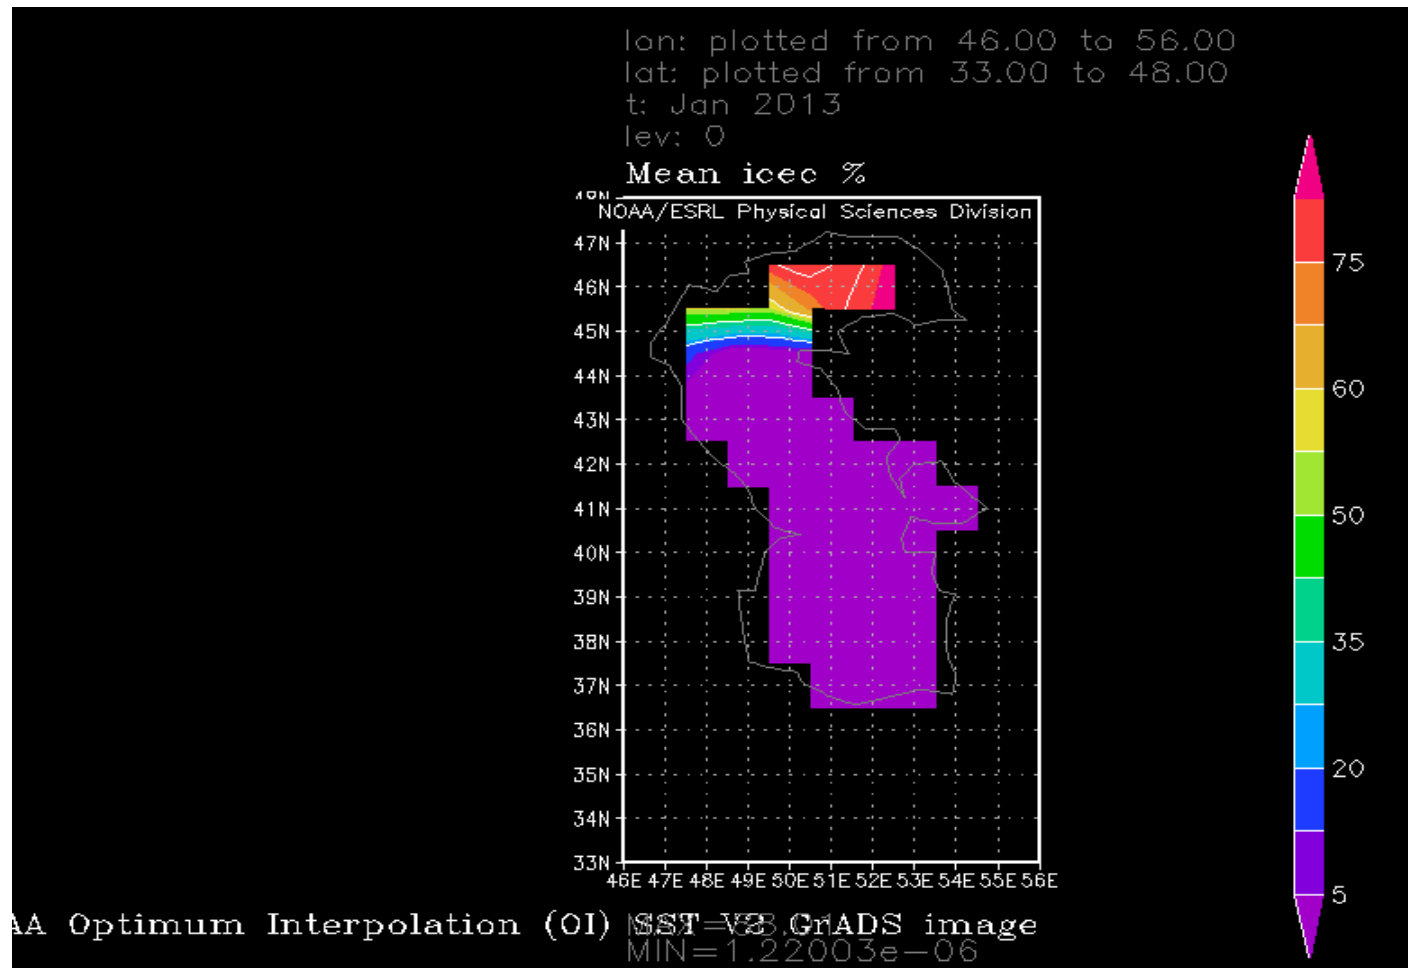

North Caspian:  
Indeed there is ice!

1/4 deg. Daily Reynolds  
Caspian ice con = 0.

# Plots from current code

Monthly mean of Jan 2013: ice concentration, SST

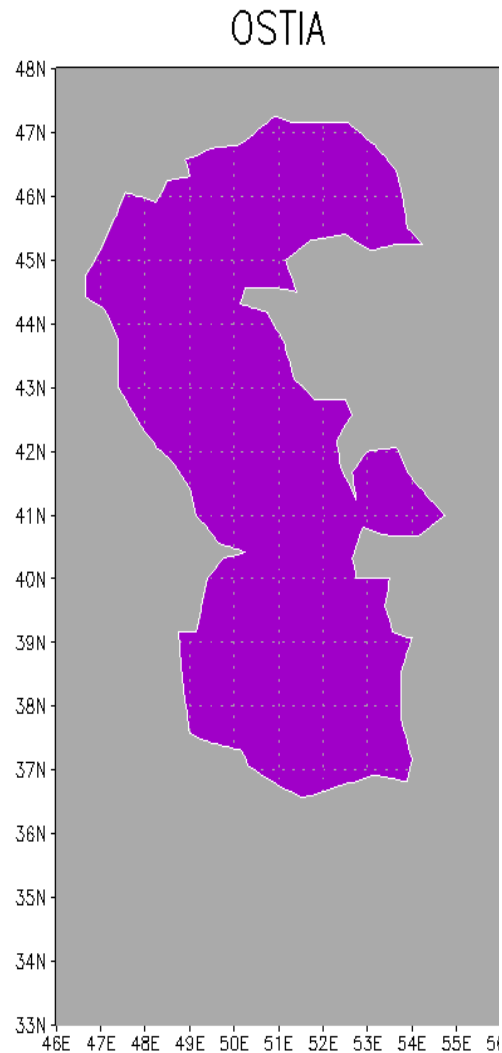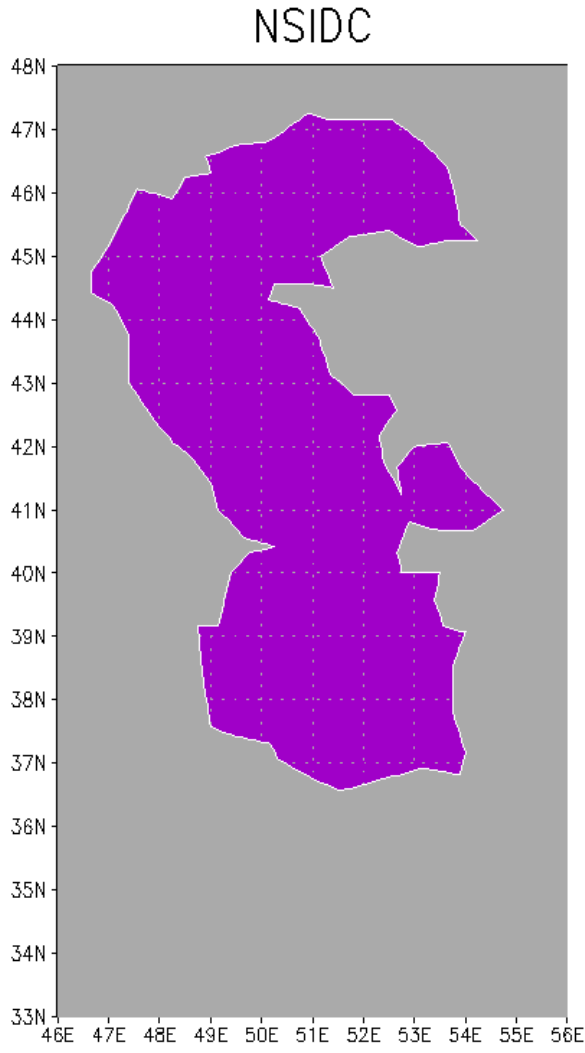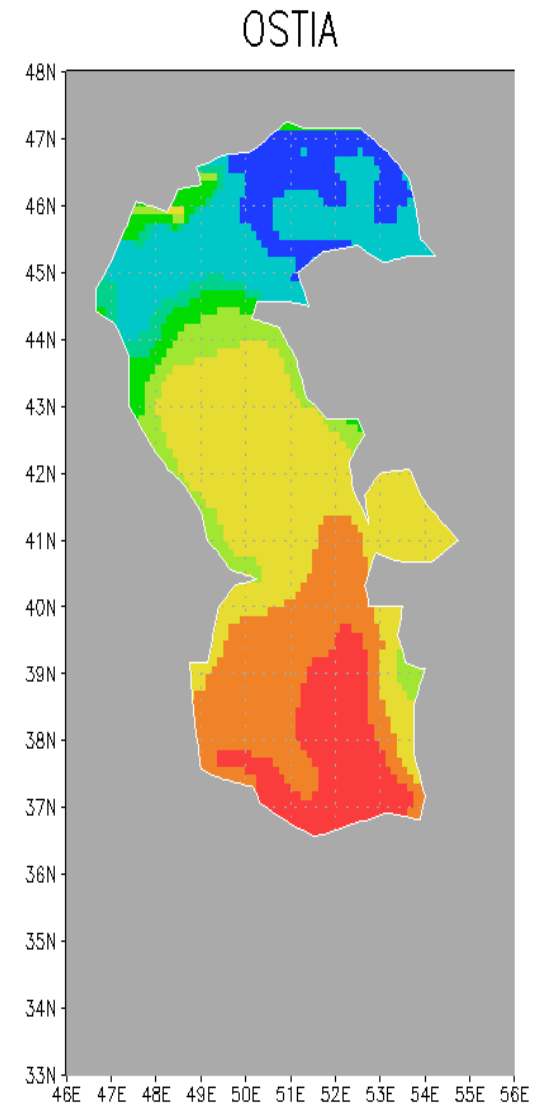

0.05 0.1 0.2 0.3 0.35 0.45 0.55 0.65 0.7 0.8 0.9 0.95

271 272 273 275 276 278 280 282. 285 289

# Empirical fits based on Weekly Reynolds

Caspian Sea: Jan, Feb, Mar, Nov, Dec

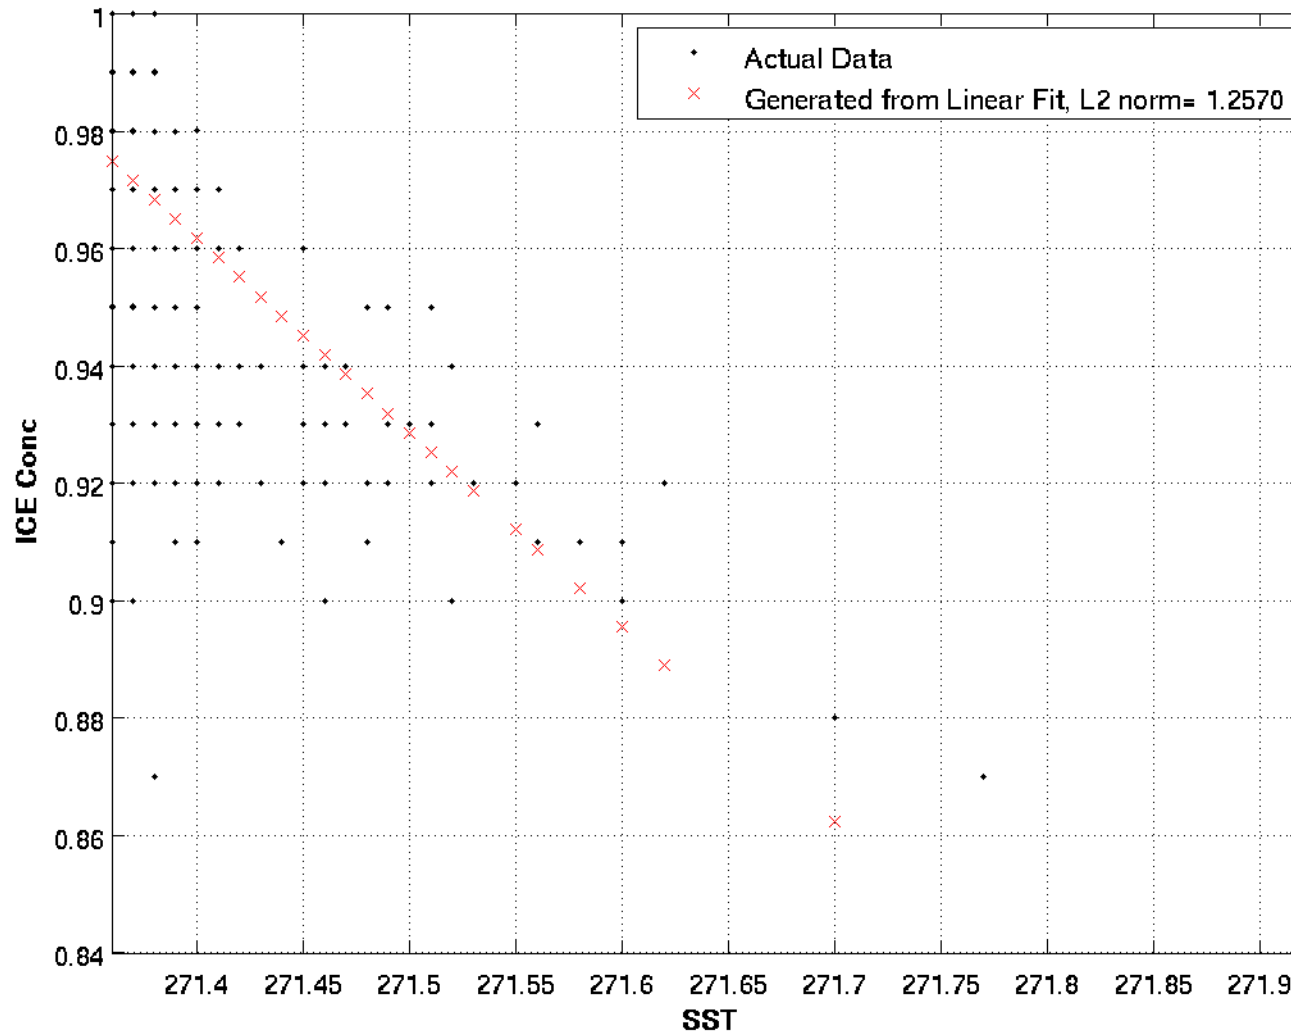

Data between  
1982- 2000 was  
used to generate a fit

and tested against  
2001- 2013 data  
as shown

# Plots from new code

Monthly mean of Jan 2013: ice concentration, SST

OSTIA

OSTIA

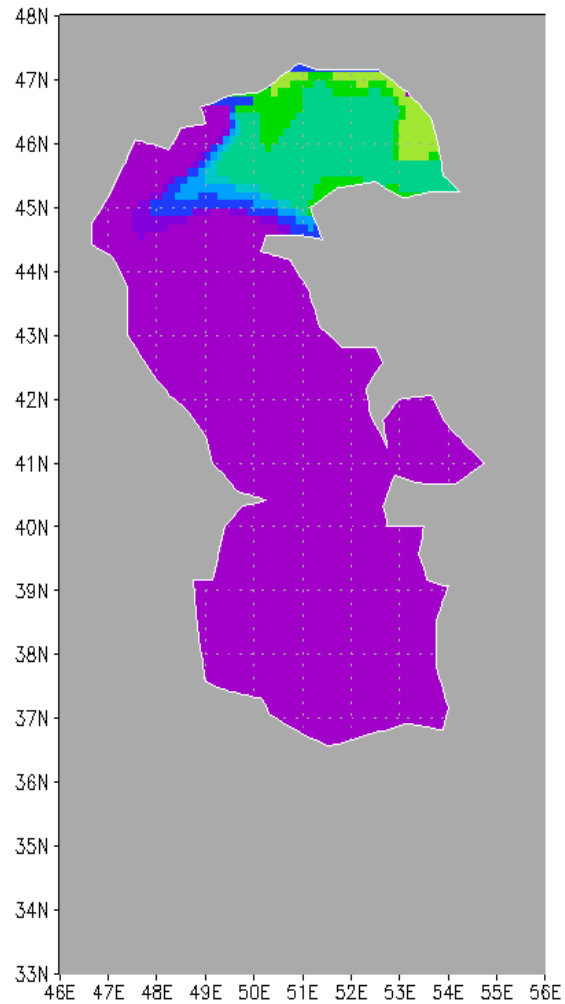

0.05 0.1 0.2 0.3 0.35 0.45 0.55 0.65 0.7 0.8 0.9 0.95

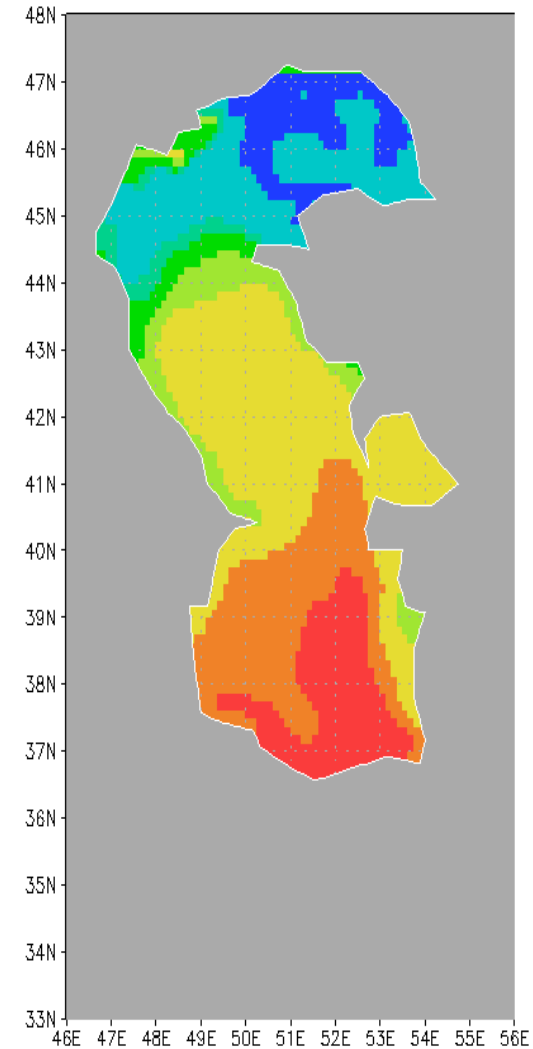

271 272 273 275 276 278 280 282 285 290

# Plots from new code

Monthly mean of Jan 2013: ice concentration, SST

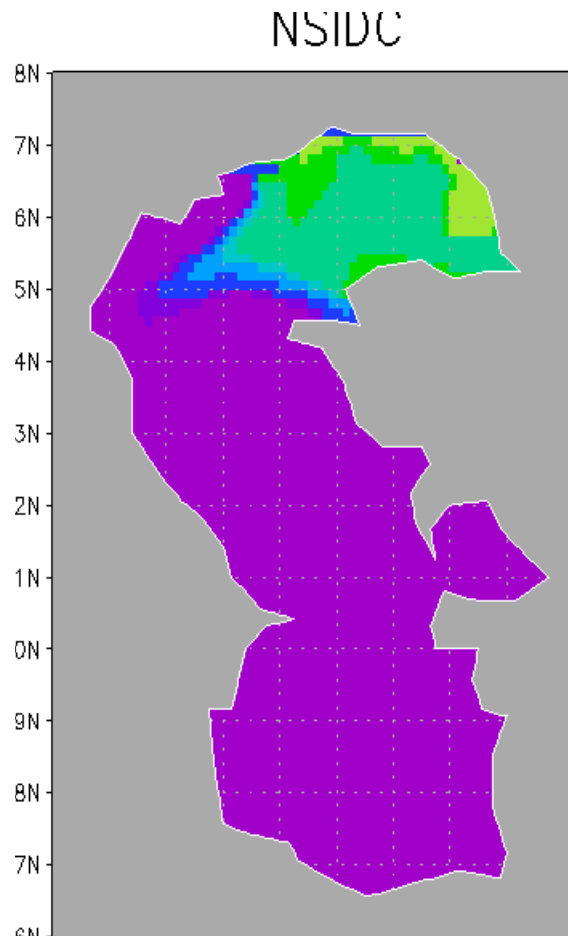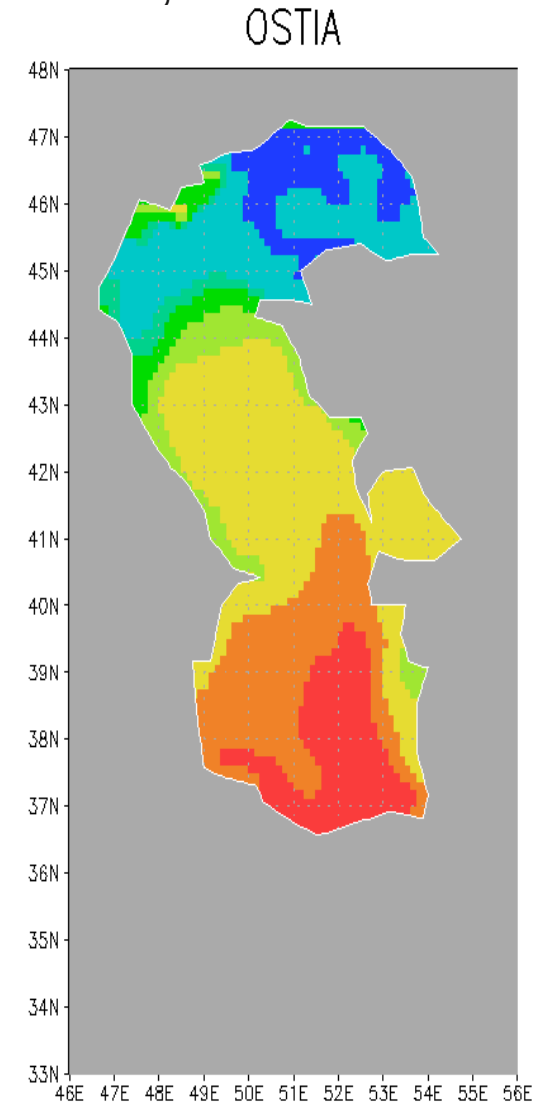

Since there is no ice data in OSTIA & NSIDC,  
Empirical fit is used in both cases. Hence  
They are SAME, as shown above.

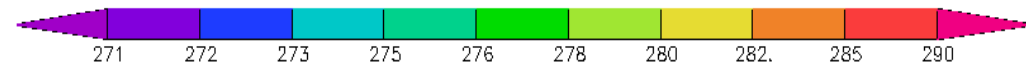

Supplement: Supplementary file 1 [file gmd-9-799-2016-supplement.zip]
