# Supplementary material for: The description and validation of the computationally Efficient CH 4 –CO–OH (ECCOHv1.01) chemistry module for 3-D model applications
Source: Copernicus journal article supplement (doi:10.5194/gmd-9-799-2016), 2016-02-26
Supplement: Supplementary file 2 [file gmd-9-799-2016-supplement.zip]

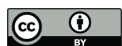

*Supplement of*

## **The description and validation of the computationally Efficient CH<sub>4</sub>–CO–OH (ECCOHv1.01) chemistry module for 3-D model applications**

**Yasin F. Elshorbany et al.**

*Correspondence to:* Yasin F. Elshorbany (yasin.f.elshorbany@nasa.gov)

- [gmd-9-799-2016-supplement-title-page.pdf](#)
- [Heracles\\_4\\_ECCOH.zip](#)
- [gmd-2015-218-supplement-version2.pdf](#)

The copyright of individual parts of the supplement might differ from the CC-BY 3.0 licence.
