# Supplementary material for: The description and validation of the computationally Efficient CH 4 –CO–OH (ECCOHv1.01) chemistry module for 3-D model applications
Source: Copernicus journal article supplement (doi:10.5194/gmd-9-799-2016), 2016-02-26
Supplement: Supplementary file 3 [file gmd-9-799-2016-supplement.zip]

# 1. Emissions

In this section, we show the various emissions used in the simulation scenarios (Table 1 and Table 2).

## 1.1 Methane

As shown below, CTL total emissions (annually-repeating natural sources (i.e., wetlands and biomass burning) and annually-varying anthropogenic sources) are higher in the northern hemisphere by about 20% while EXTRA emissions (all emissions vary) are higher by about 20% in the tropics (Patra et al., 2011).

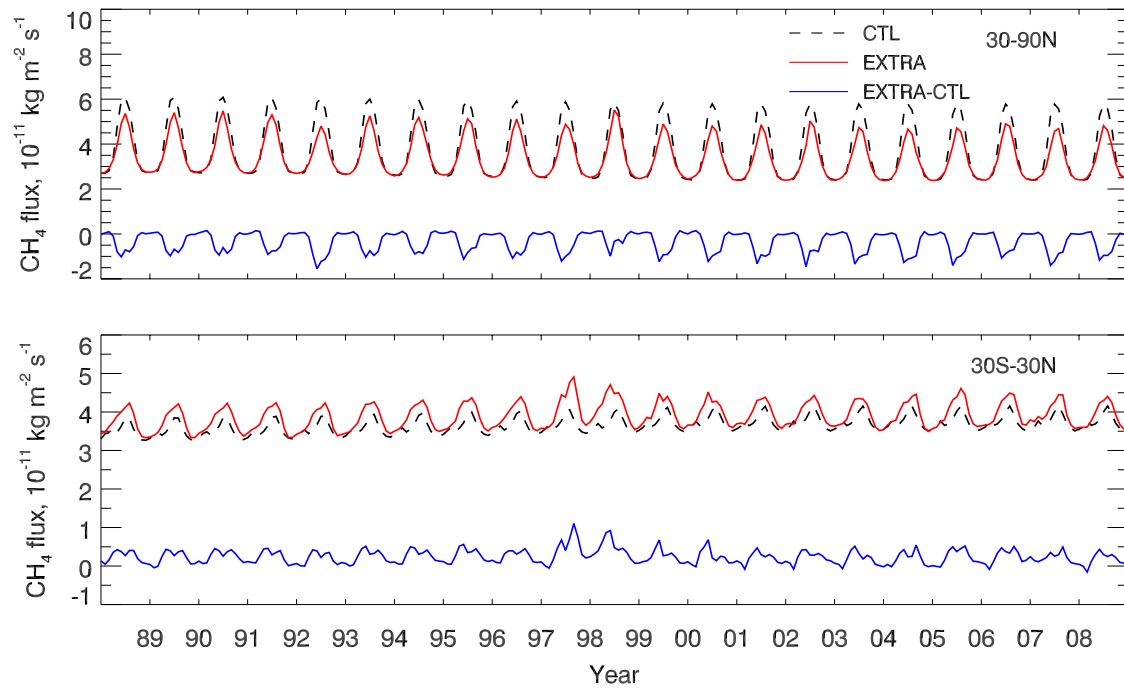

Figure S 1: Monthly methane CTL (dashed) and EXTRA (red) emissions ( $\times 10^{-11}$  kg/m<sup>2</sup>/s) used in the *Base* and *E<sub>CH4</sub>Vary* scenarios, respectively. The difference between them is shown in blue (EXTRA-CTL).

## 1.2 CO

Here, we show the biomass burning (BB) and fossil fuel (FF) CO emissions used in the *Base* and *AllVary* scenarios.

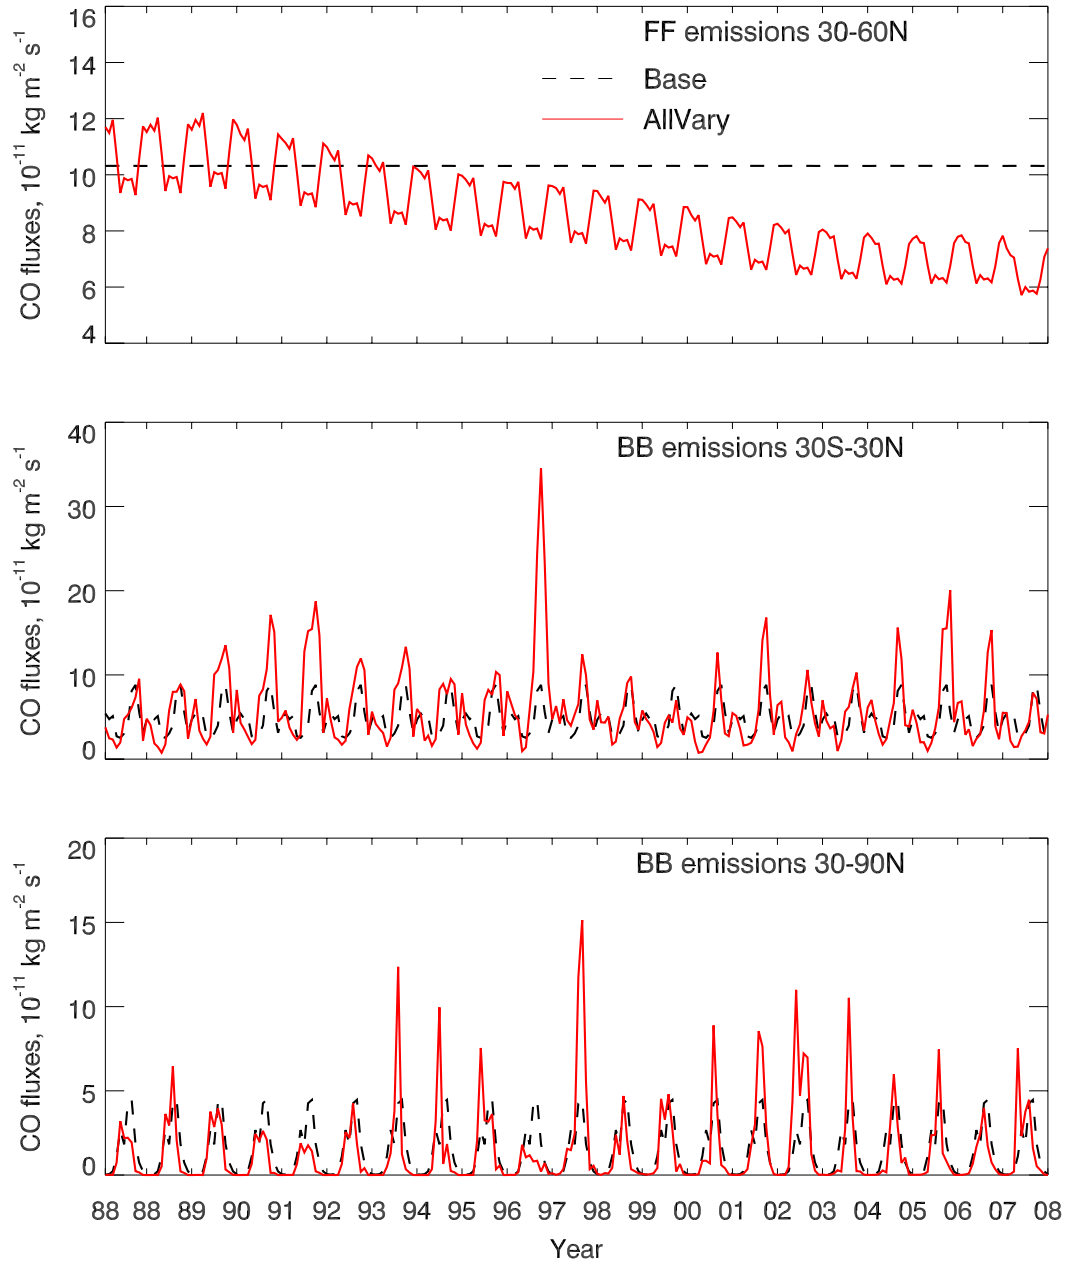

Figure S 2: Monthly CO emissions ( $\times 10^{-11} \text{ kg/m}^2/\text{s}$ ) used in the *Base* and *AllVary* scenarios.

The figure below shows the sensitivity of the global burdens of methane, CO, and OH to emissions. For instance, the simulated larger burdens of CO levels in the  $BBE_{CO}Vary$  scenario lead to decreased OH levels and thus higher methane burdens compared to the  $E_{CH_4}Vary$  scenario.

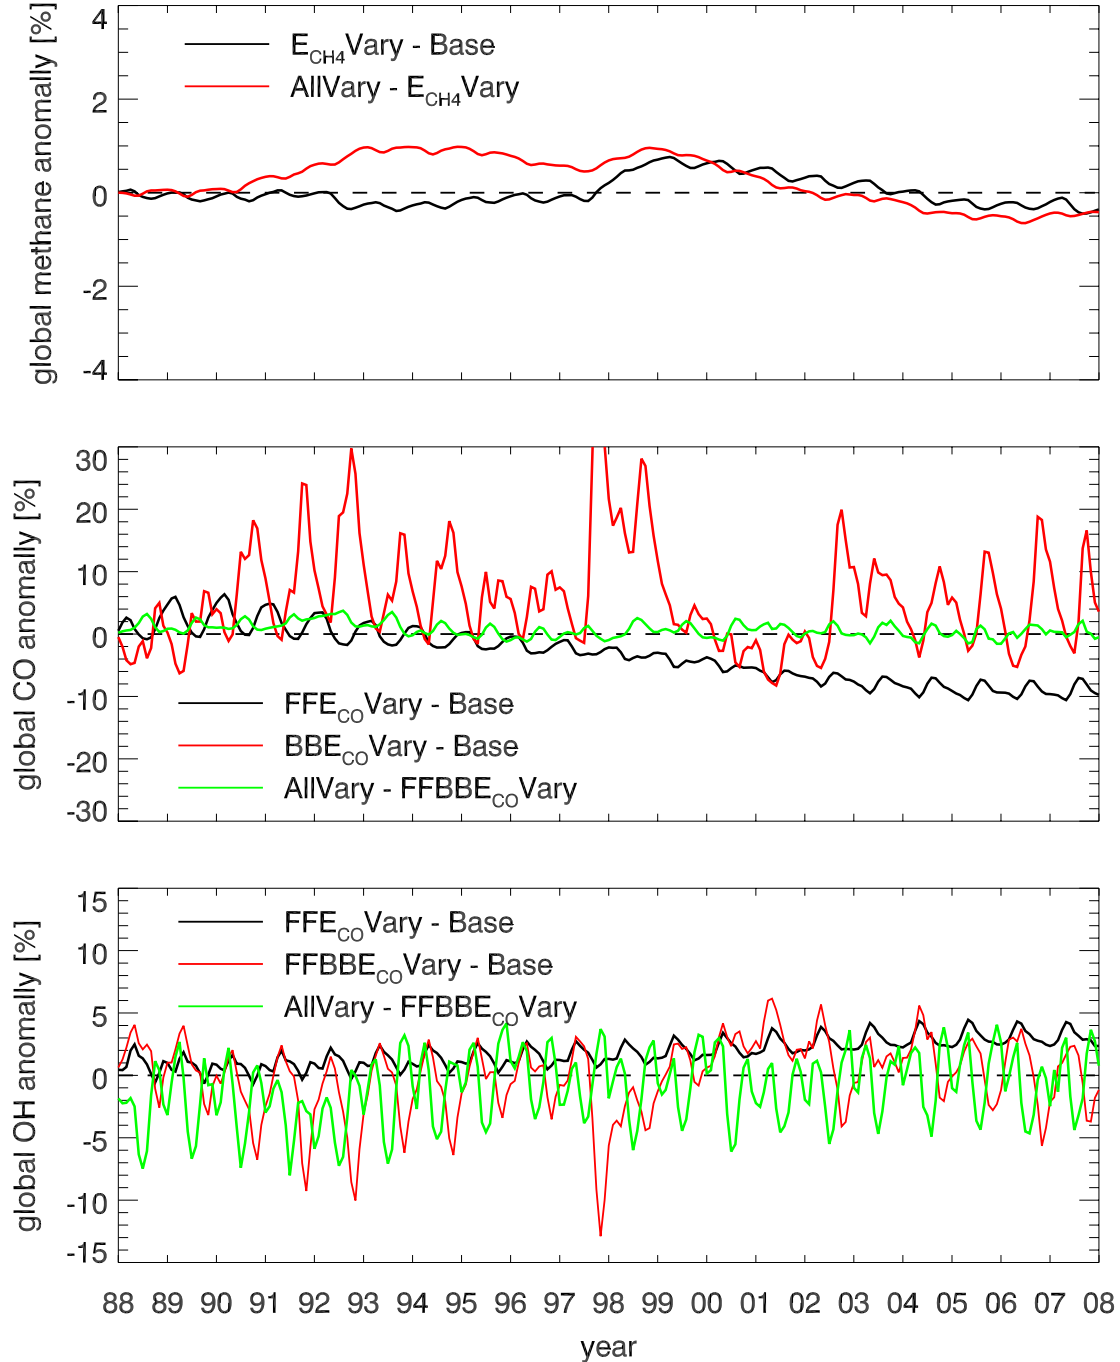

Figure S 3: Relative difference (%) of globally mass-weighted tropospheric methane, CO, and OH (from up to bottom) between the different scenarios.

## 2. Comparison to measurements

### 2.1 Methane

#### Global Methane Growth Rate

We reproduce Figure 4a in the manuscript but show the difference between the *Base* and  $OH_{input}Vary$  (Figure S 4) and  $FFBBE_{CO}Vary$  (Figure S 5) scenarios. These figures incorporate the results concluded in Sect. 4.3 demonstrating the non-linear feedbacks on methane's growth rate. It further demonstrates that non-linear feedbacks on growth rates in 1994-1997 are mainly due to interannual variability in OH constraints (Figure S 4) while the other non-linear feedbacks are related to interannual variability in CO emissions (Figure S 5).

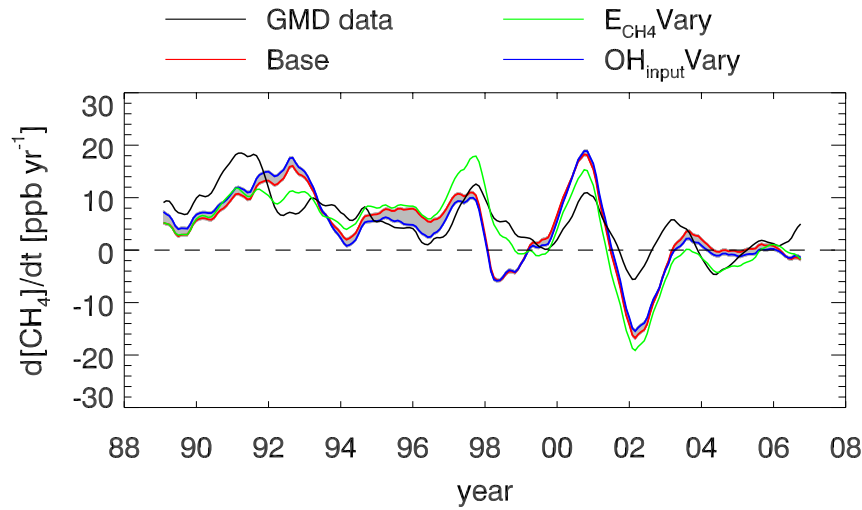

Figure S 4: 12-month running mean atmospheric growth rate of methane ( $\text{ppbv yr}^{-1}$ ) for the average of 92 GMD stations and from model output averaged for those station locations for several scenarios. The shaded area is the difference between the  $OH_{input}Vary$  and *Base* scenarios.

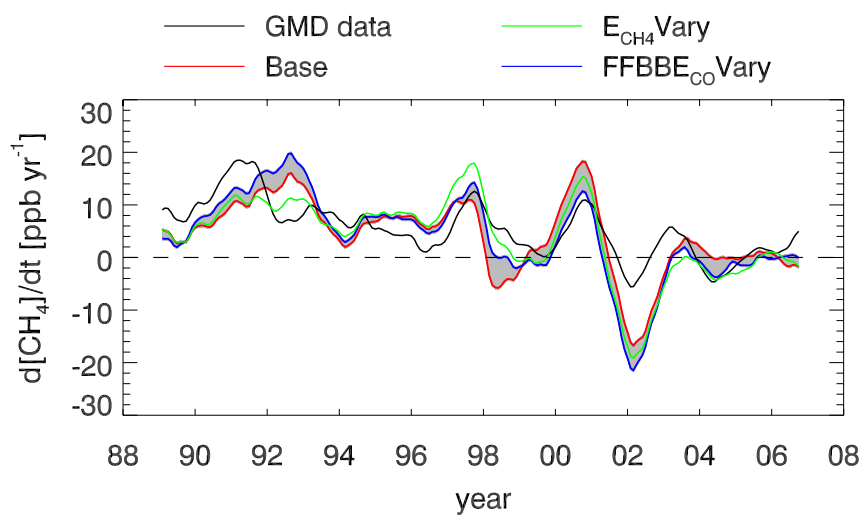

Figure S 5: Same as Figure S 4 but the shaded area is the difference between the  $\text{FFBEC}_{\text{CO}}$  Vary and Base scenarios.

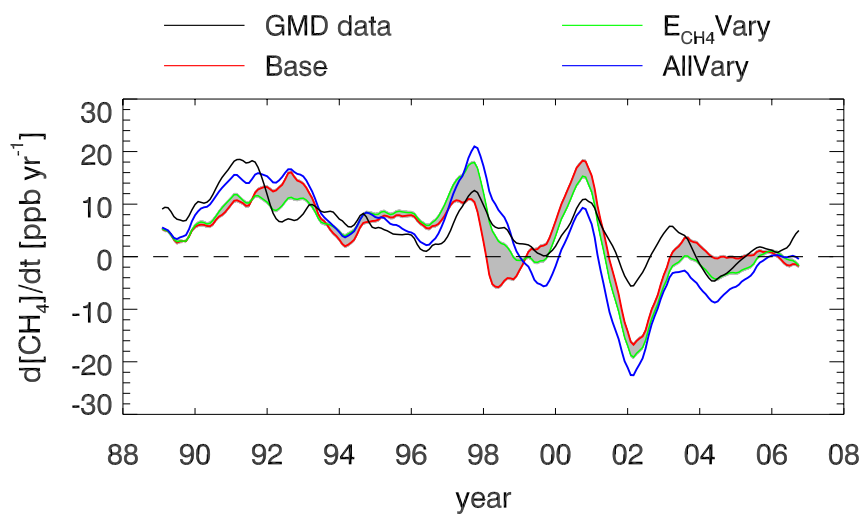

Figure S 6: Same as Figure S 4 but the shaded area is the difference between the  $E_{\text{CH}_4}\text{Vary}$  and *Base* scenarios.

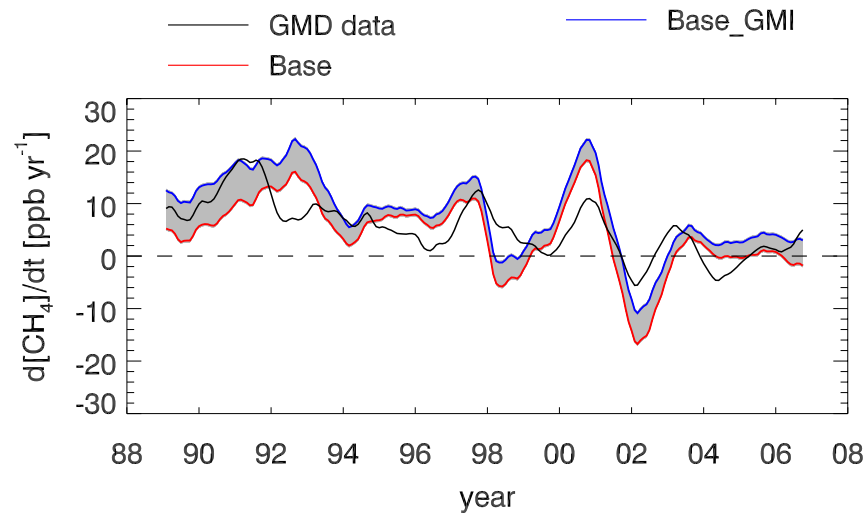

Figure S 7: Same as Figure S 4 but the shaded area is the difference between the *Base\_GMI* and *Base* scenarios. The *Base\_GMI* scenario is similar to the *Base* scenario, except that OH concentrations are from a full chemistry simulation of the NASA Global Modeling Initiative (GMI) model.

## GMD Measurements

Here, we show the comparison of simulated methane by different scenarios (that are not shown in the manuscript) as compared to GMD measurements.

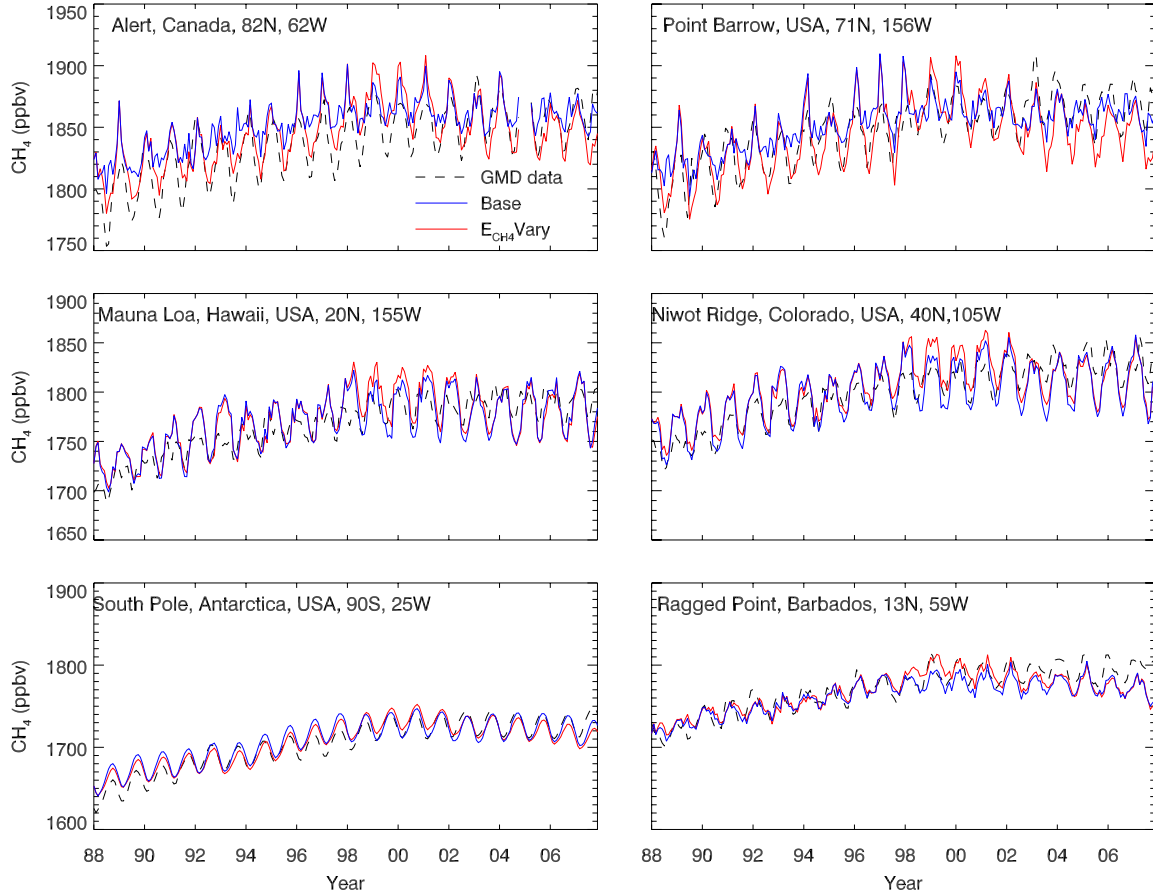

Figure S 8: Monthly methane (ppbv) from the *Base* and  $E_{\text{CH}_4}$  Vary scenarios and observations from six GMD stations.

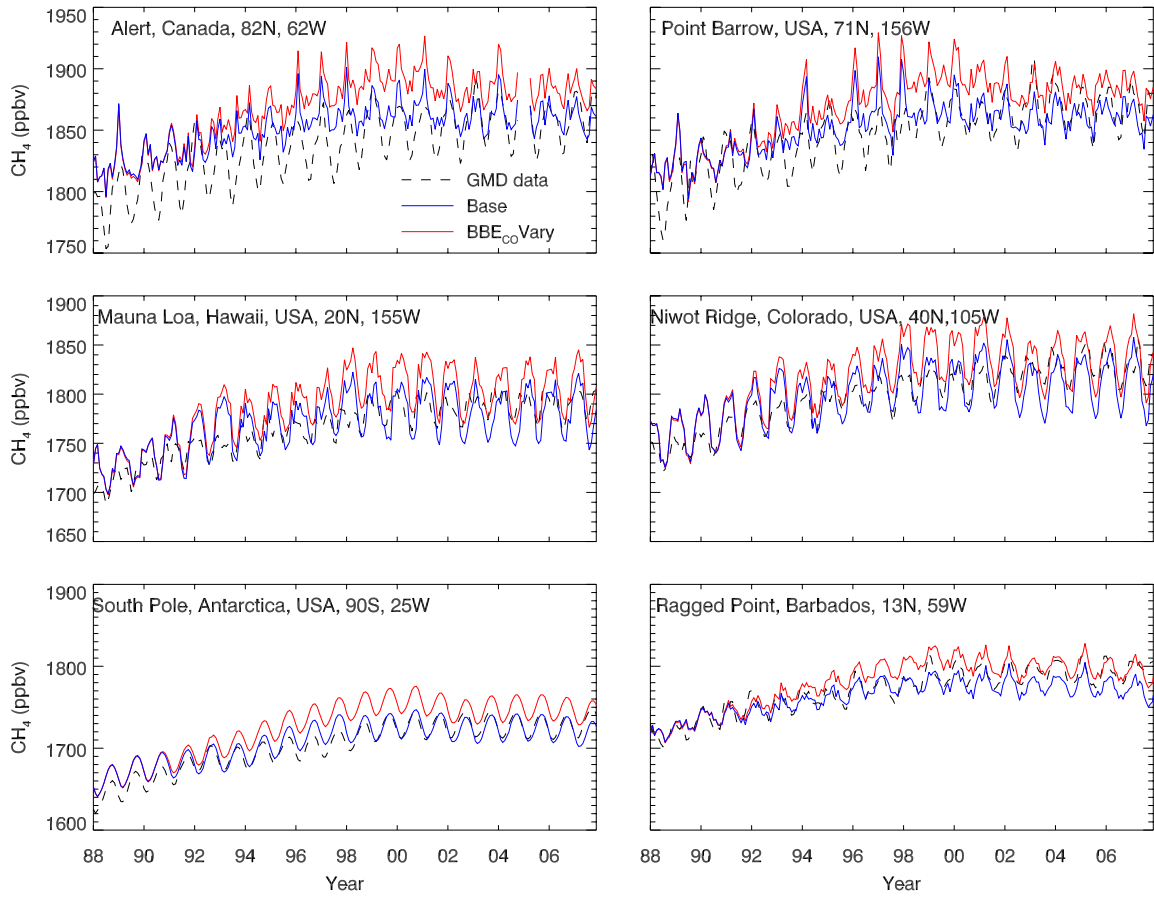

Figure S 9: Monthly methane (ppbv) from the *Base* and  $\text{BBE}_{\text{CO}}\text{Vary}$  scenarios and observations from six GMD stations.

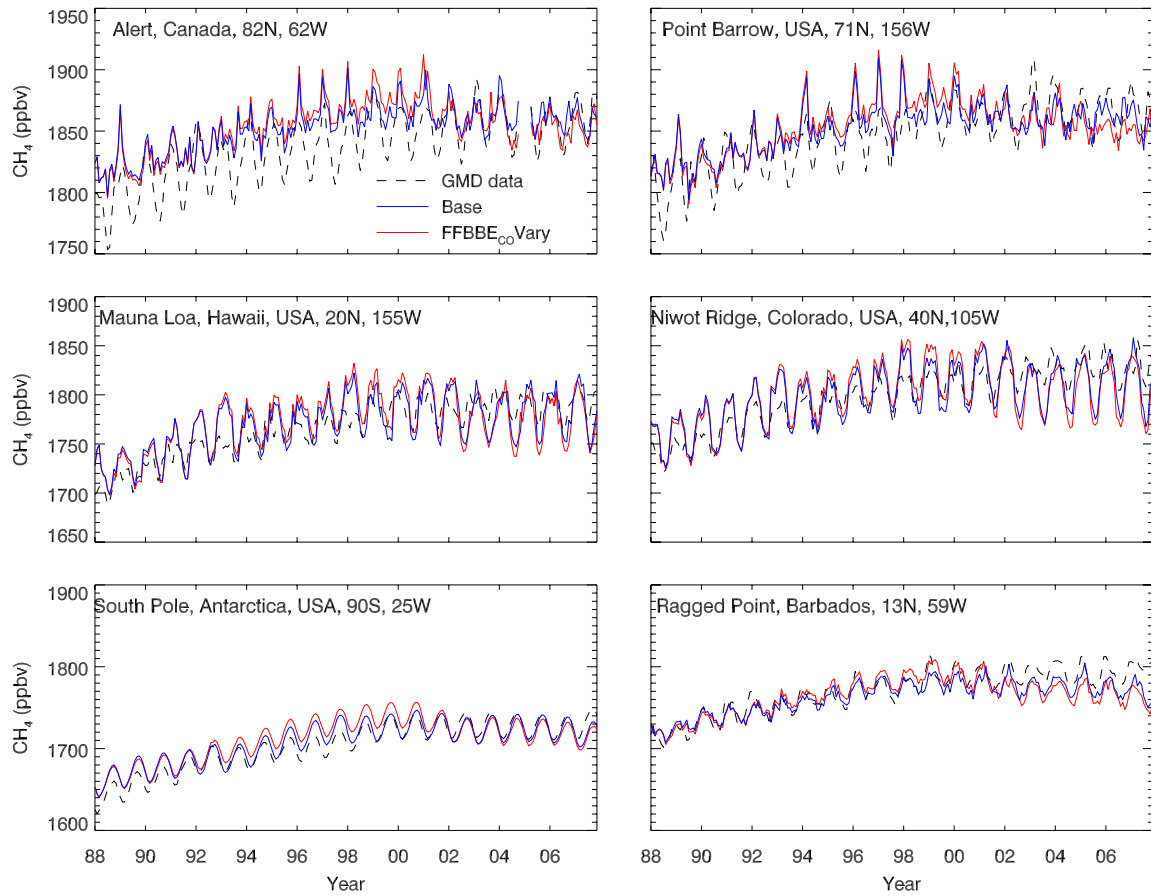

Figure S 10: Monthly methane (ppbv) from the *Base* and *FFBBE<sub>co</sub>Vary* scenarios and observations from six GMD stations.

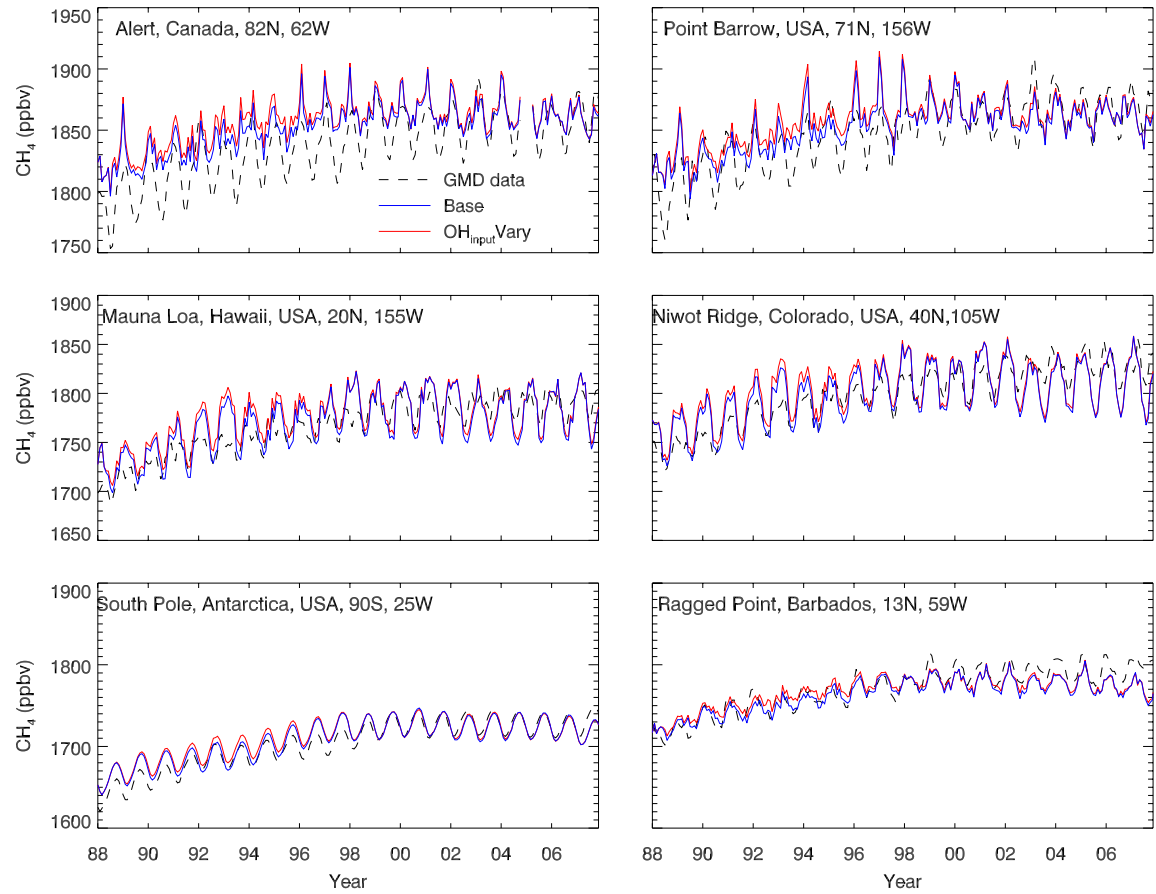

Figure S 11: Monthly methane (ppbv) from the *Base* and  $\text{OH}_{\text{input}} \text{Vary}$  scenarios and observations from six GMD stations.

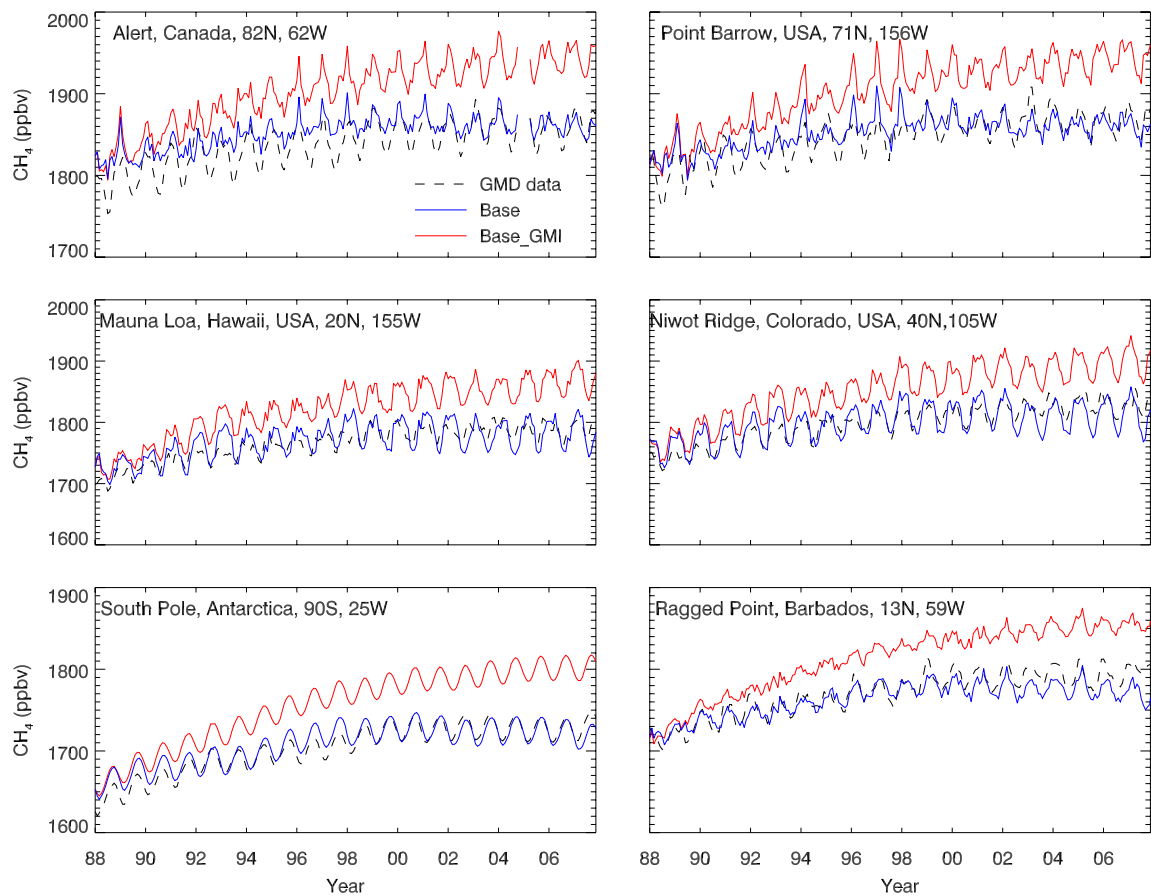

Figure S 12: Monthly methane (ppbv) from the *Base* and *Base\_GMI* scenarios and observations from six GMD stations. The *Base\_GMI* scenario is similar to the *Base* scenario, except that OH concentrations are from a full chemistry simulation of the GMI model.

## 2.2 CO

Here, we show additional figures for the comparison of simulated CO as compared to measurements.

### GMD measurements

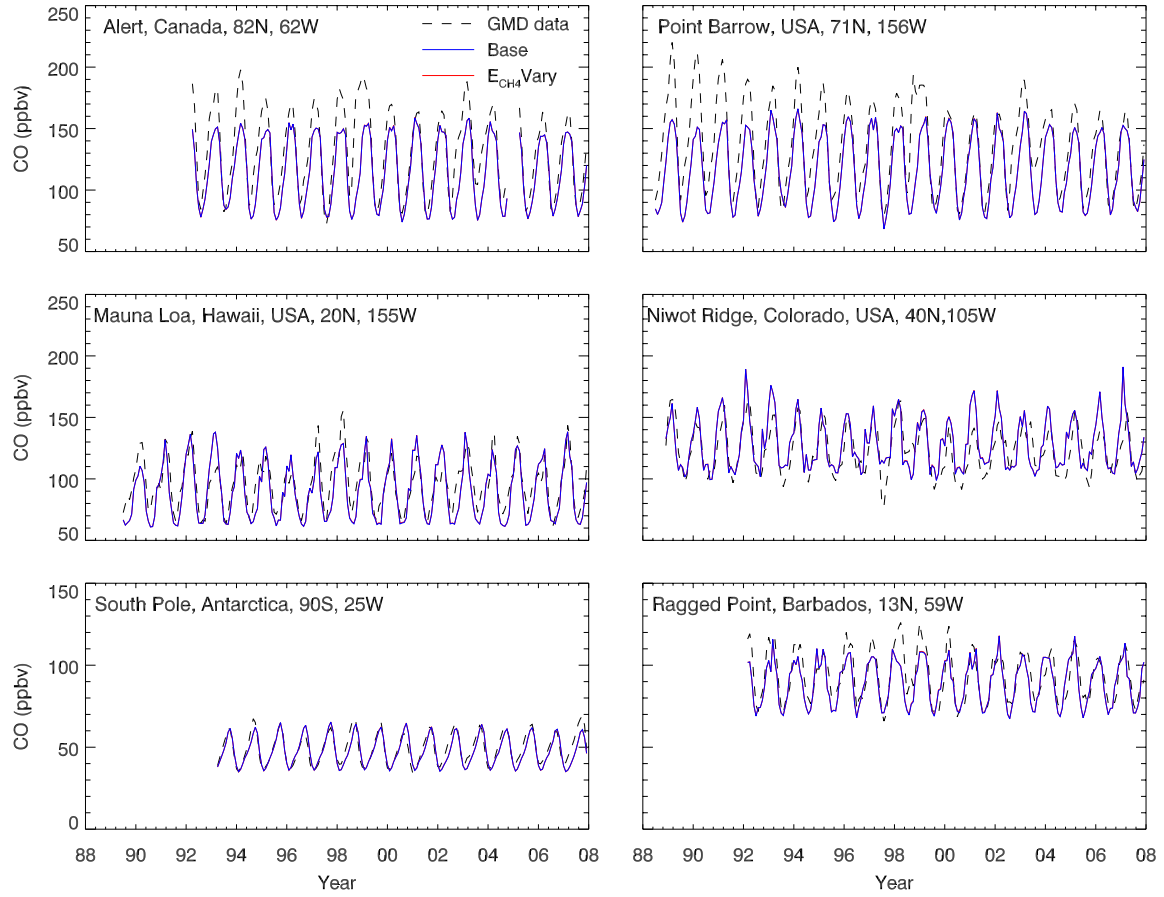

Figure S 13: Measured and simulated monthly near surface CO levels from the *Base* and *E<sub>CH4</sub>Vary* scenarios.

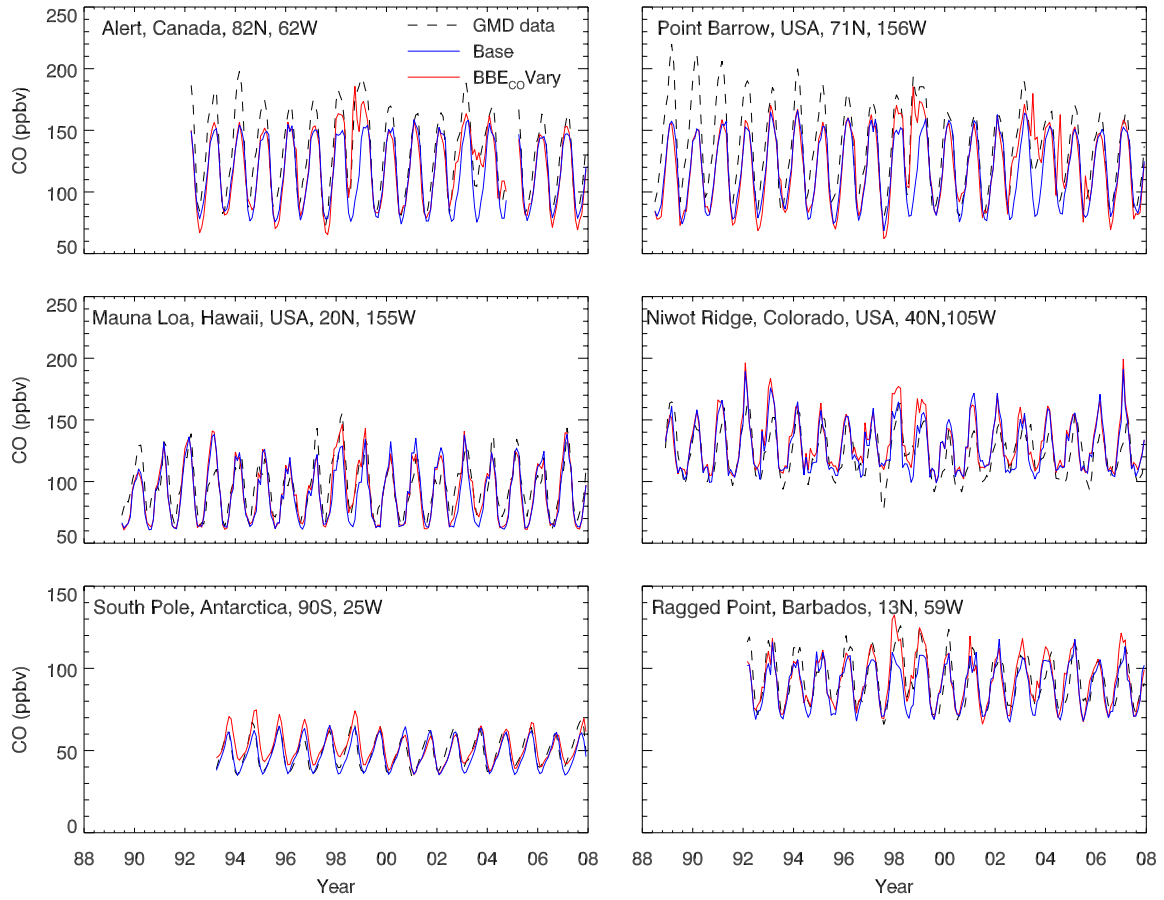

Figure S 14: Measured and simulated monthly near surface CO levels from the *Base* and *BBE<sub>CO</sub>Vary* scenarios.

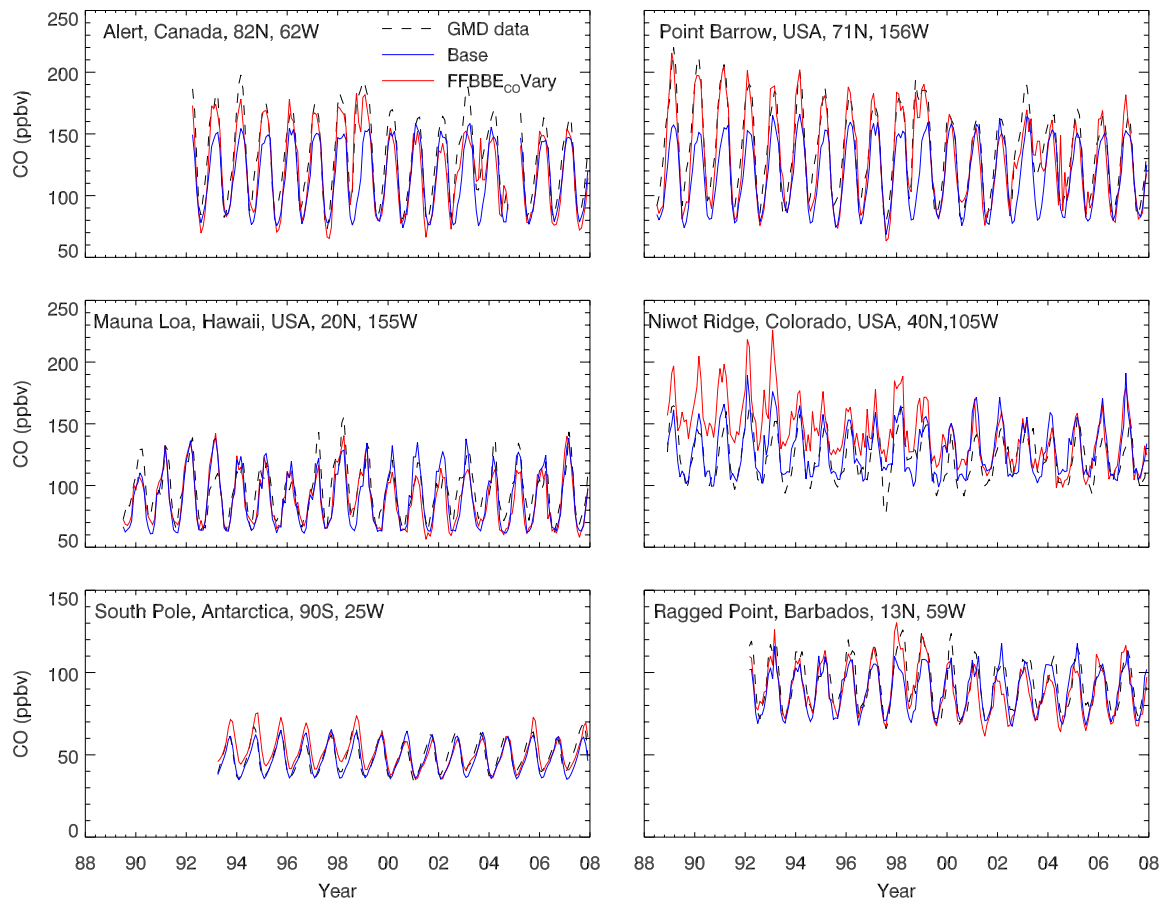

Figure S 15: Measured and simulated monthly near surface CO levels from the *Base* and *FFBBe<sub>CO</sub>Vary* scenarios.

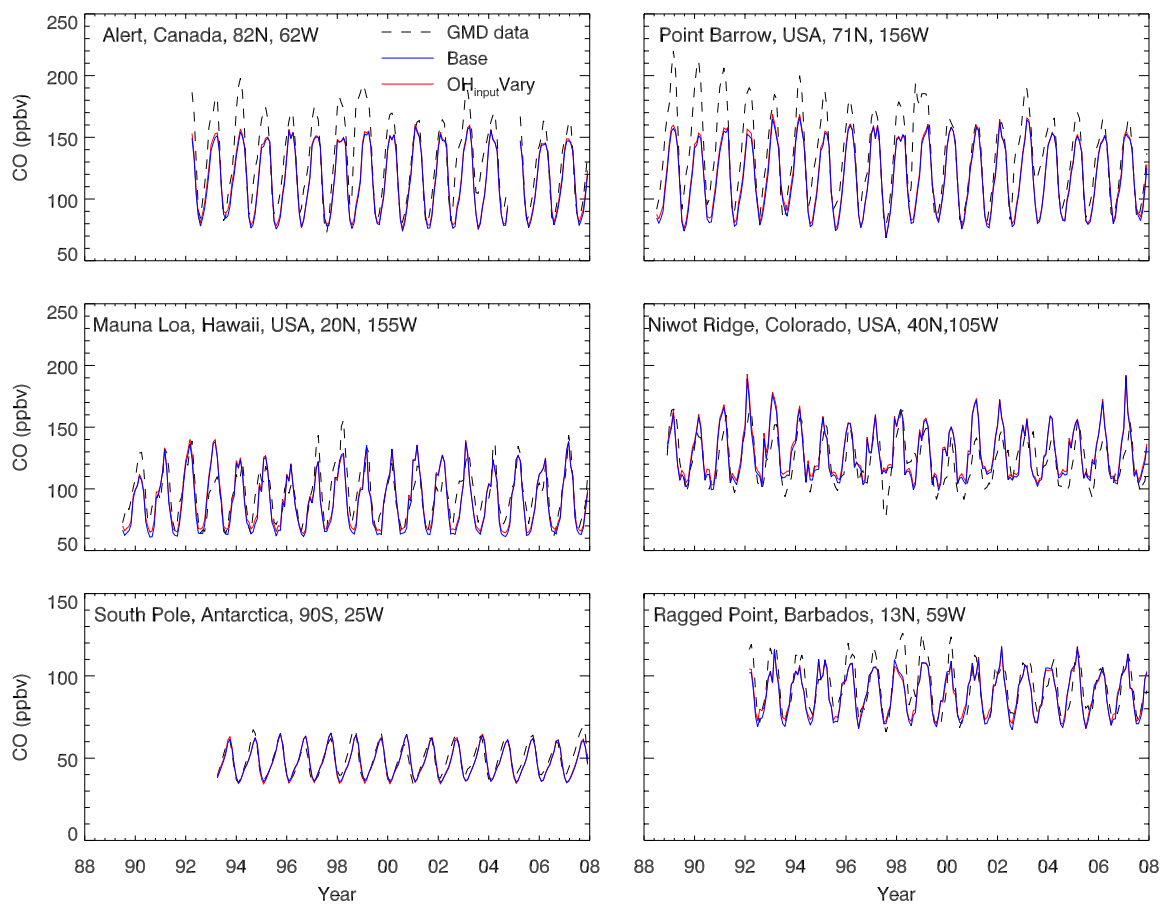

Figure S 16: Measured and simulated monthly near surface CO levels from the *Base* and *OH<sub>input</sub>Vary* scenarios.

### 3. Comparison of simulated OH to full chemistry simulation.

Here, we compare simulated OH from the *Base* and *AllVary* scenario to that of ACCMIP.

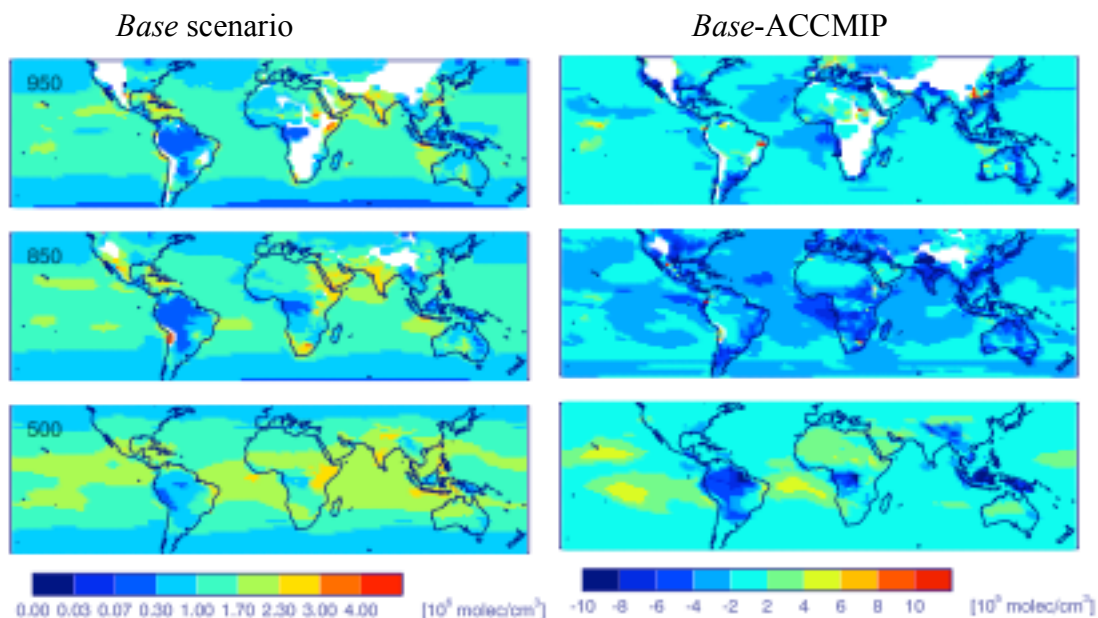

Figure S 17: Annual mean OH (left column;  $\times 10^6 \text{ molecules/cm}^3$ ) from 1999-2007 for the *Base* scenario and their corresponding difference ( $\times 10^5 \text{ molecules/cm}^3$ ) from the full chemistry ACCMIP (GEOS5CCM) simulation (*Base-ACCMIP*, right panels) at 950, 850 and 500 mb (from top to bottom). White gaps indicate no model output at that pressure level.

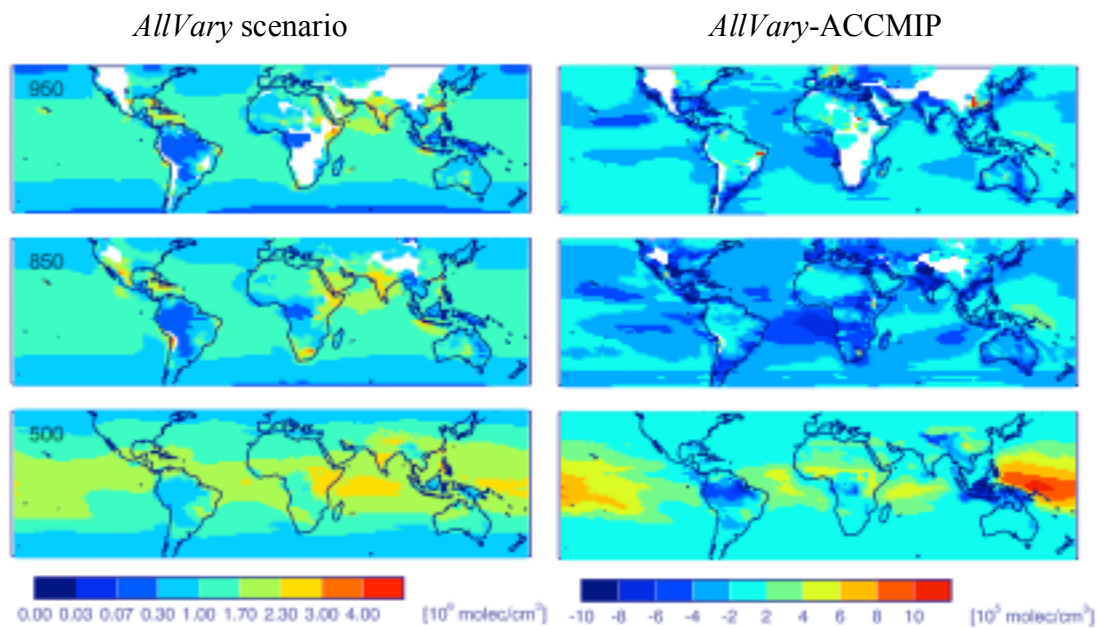

Figure S 18: Annual mean OH (left column,  $10^6 \text{ molecules/cm}^3$ ) from 1999-2007 for the *AllVary* scenario and the corresponding difference ( $10^5 \text{ molecules/cm}^3$ ) from the full chemistry ACCMIP simulations (*AllVary*-ACCMIP, right column) at 950, 850 and 500 mb (from up to bottom).

#### **4. Differences in the spatial distribution of methane, CO and OH:**

Here, we show the influence of different scenarios on the spatial distribution of tropospheric methane, CO and OH.

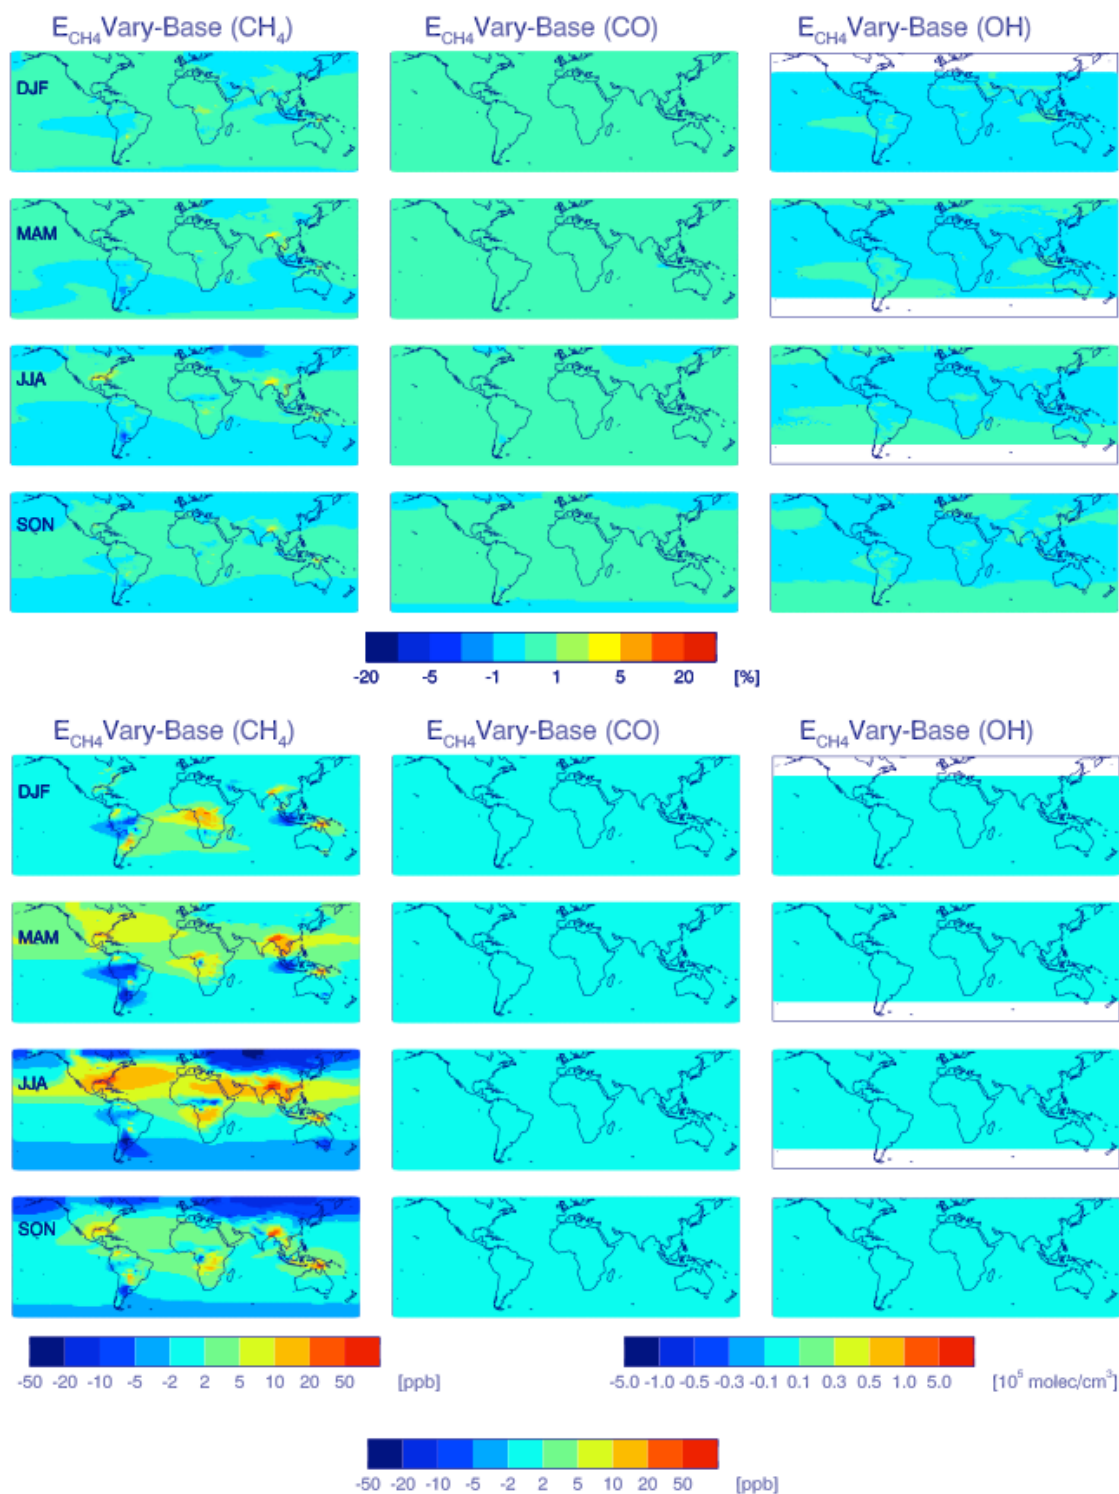

Figure S 19: Relative (%; upper panels) and absolute (lower panels) differences of seasonal, tropospheric methane (ppbv), CO (ppbv), and OH ( $\times 10^5$  molecules/cm<sup>3</sup>) between the  $E_{CH_4}$  Vary and Base scenarios.

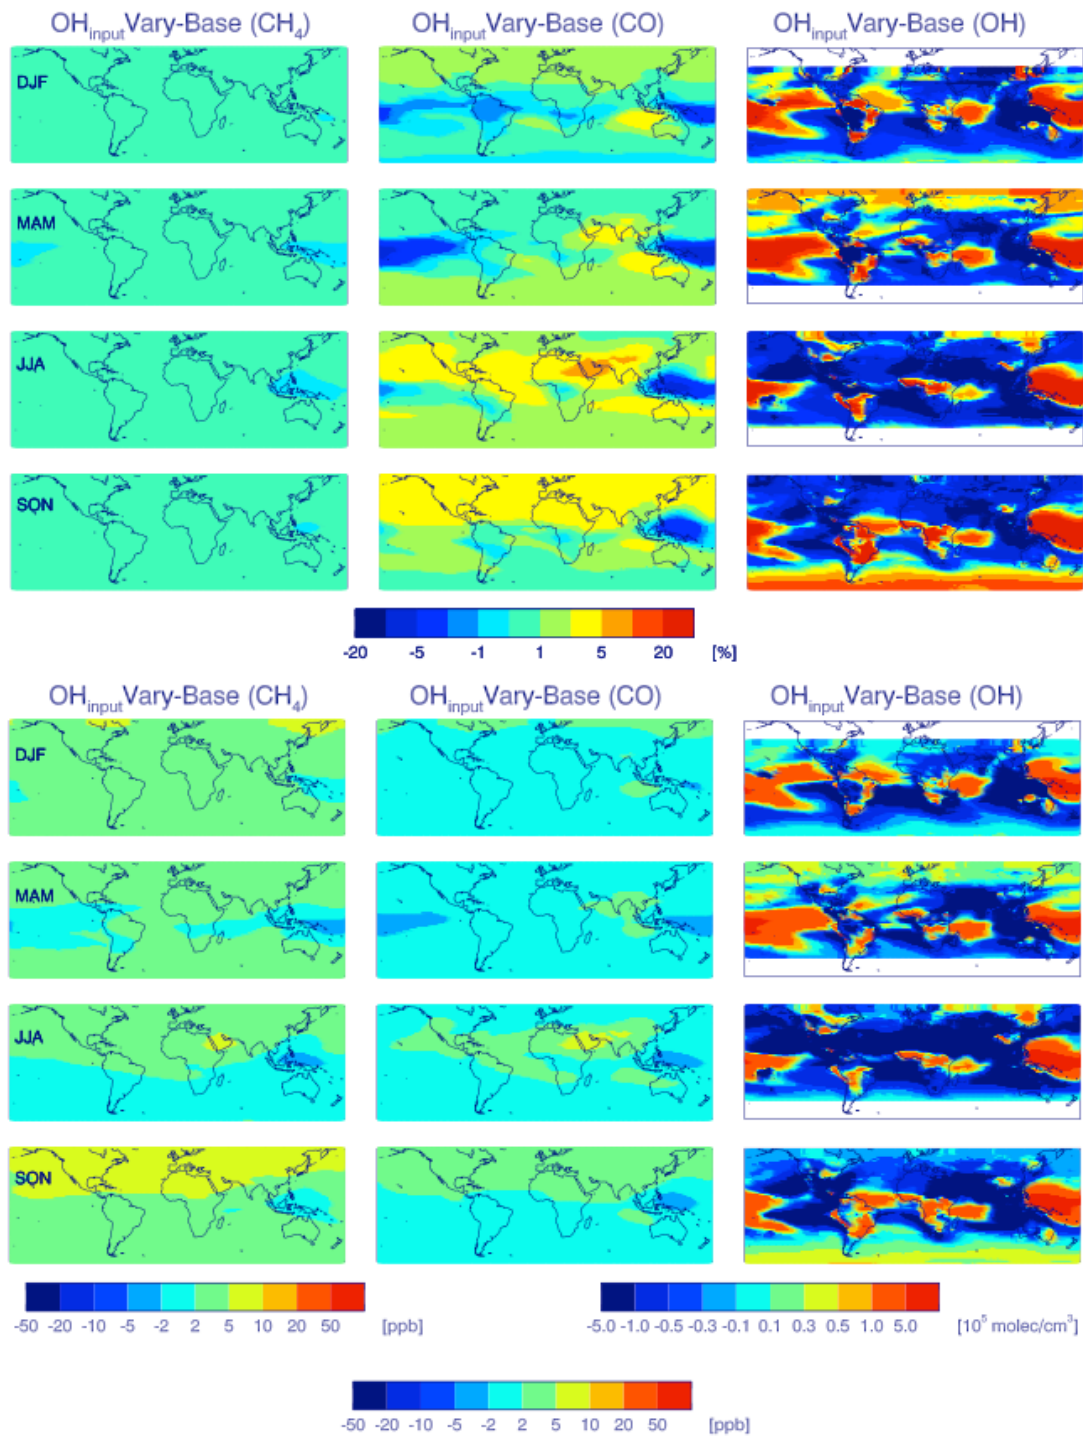

Figure S 20: Relative ( $\%$ ; upper panels) and absolute (lower panels) differences of seasonal, tropospheric methane (ppbv),  $CO$  (ppbv), and  $OH$  ( $\times 10^5 \text{ molecules/cm}^3$ ) between the  $OH_{input} Vary$  and  $Base$  scenarios.

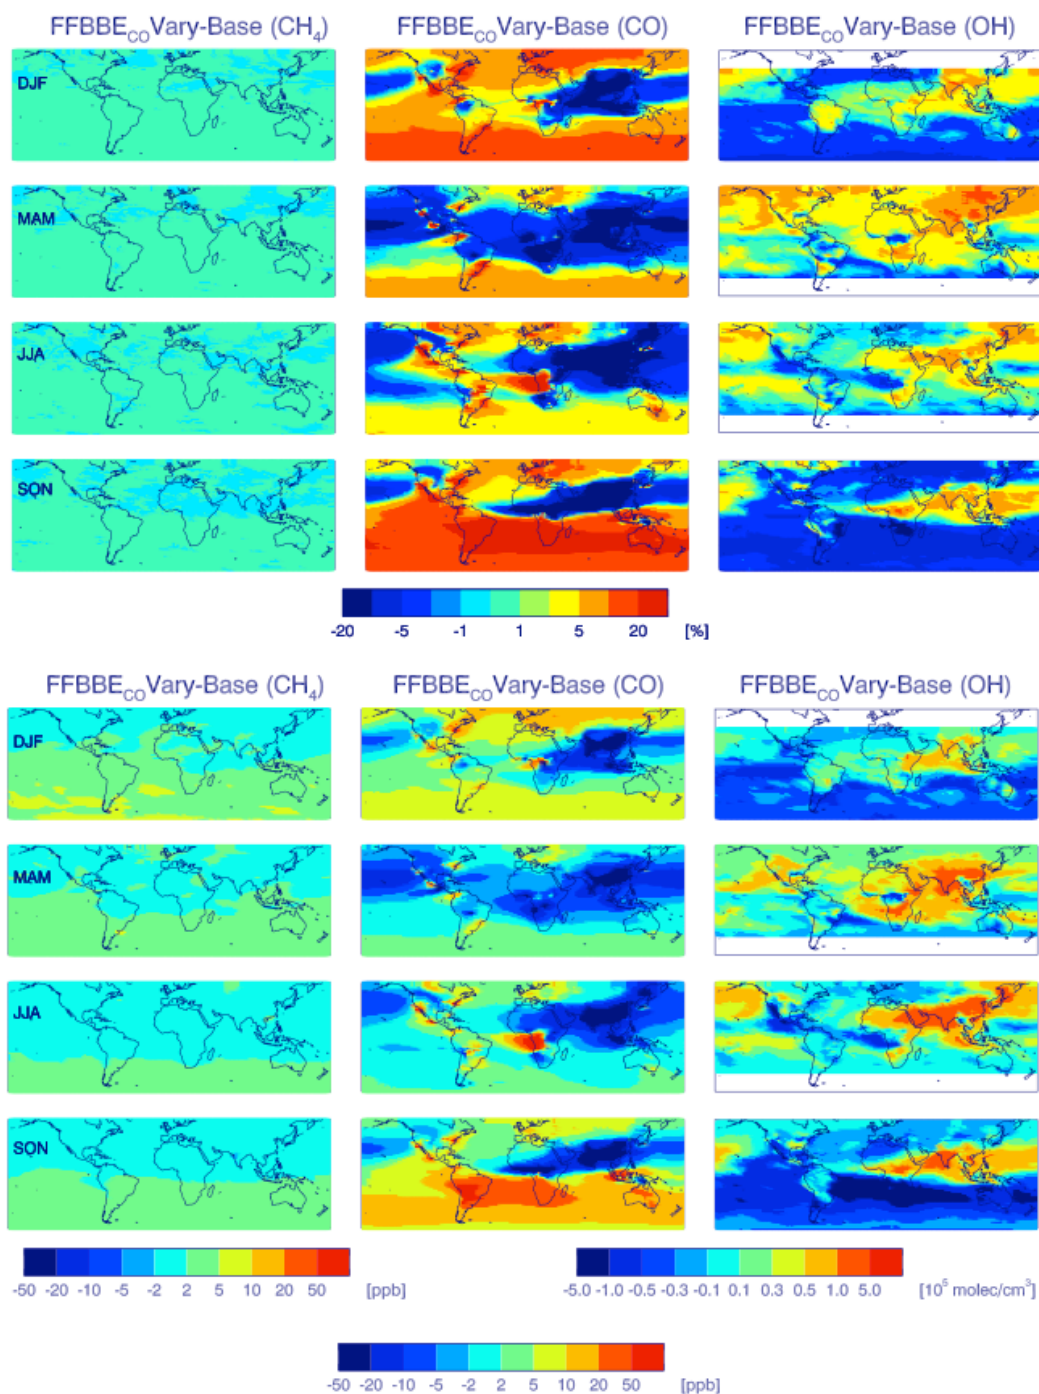

Figure S 21: Relative (%; upper panels) and absolute (lower panels) differences of seasonal, tropospheric methane (ppbv), CO (ppbv), and OH ( $\times 10^5$  molecules/cm<sup>3</sup>) between the *FFBBE<sub>CO</sub> Vary* and *Base* scenarios.

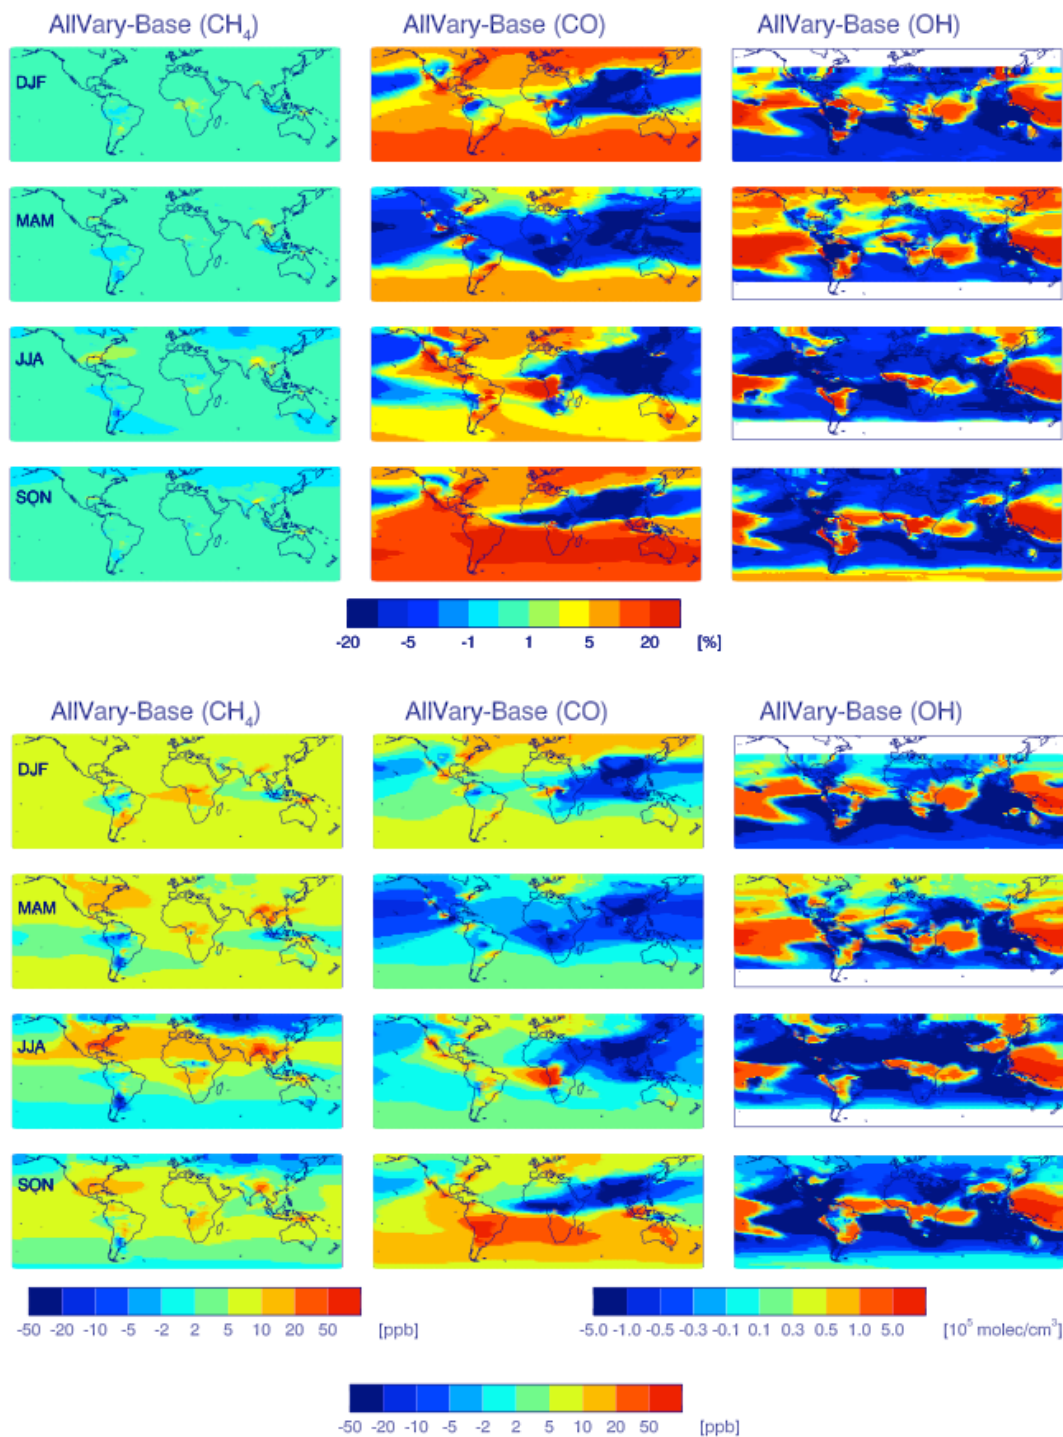

Figure S 22: Relative (%) upper panels) and absolute (lower panels) differences of seasonal, tropospheric methane (ppbv), CO (ppbv), and OH ( $\times 10^5 \text{ molecules/cm}^3$ ) between the *AllVary* and *Base* scenarios.

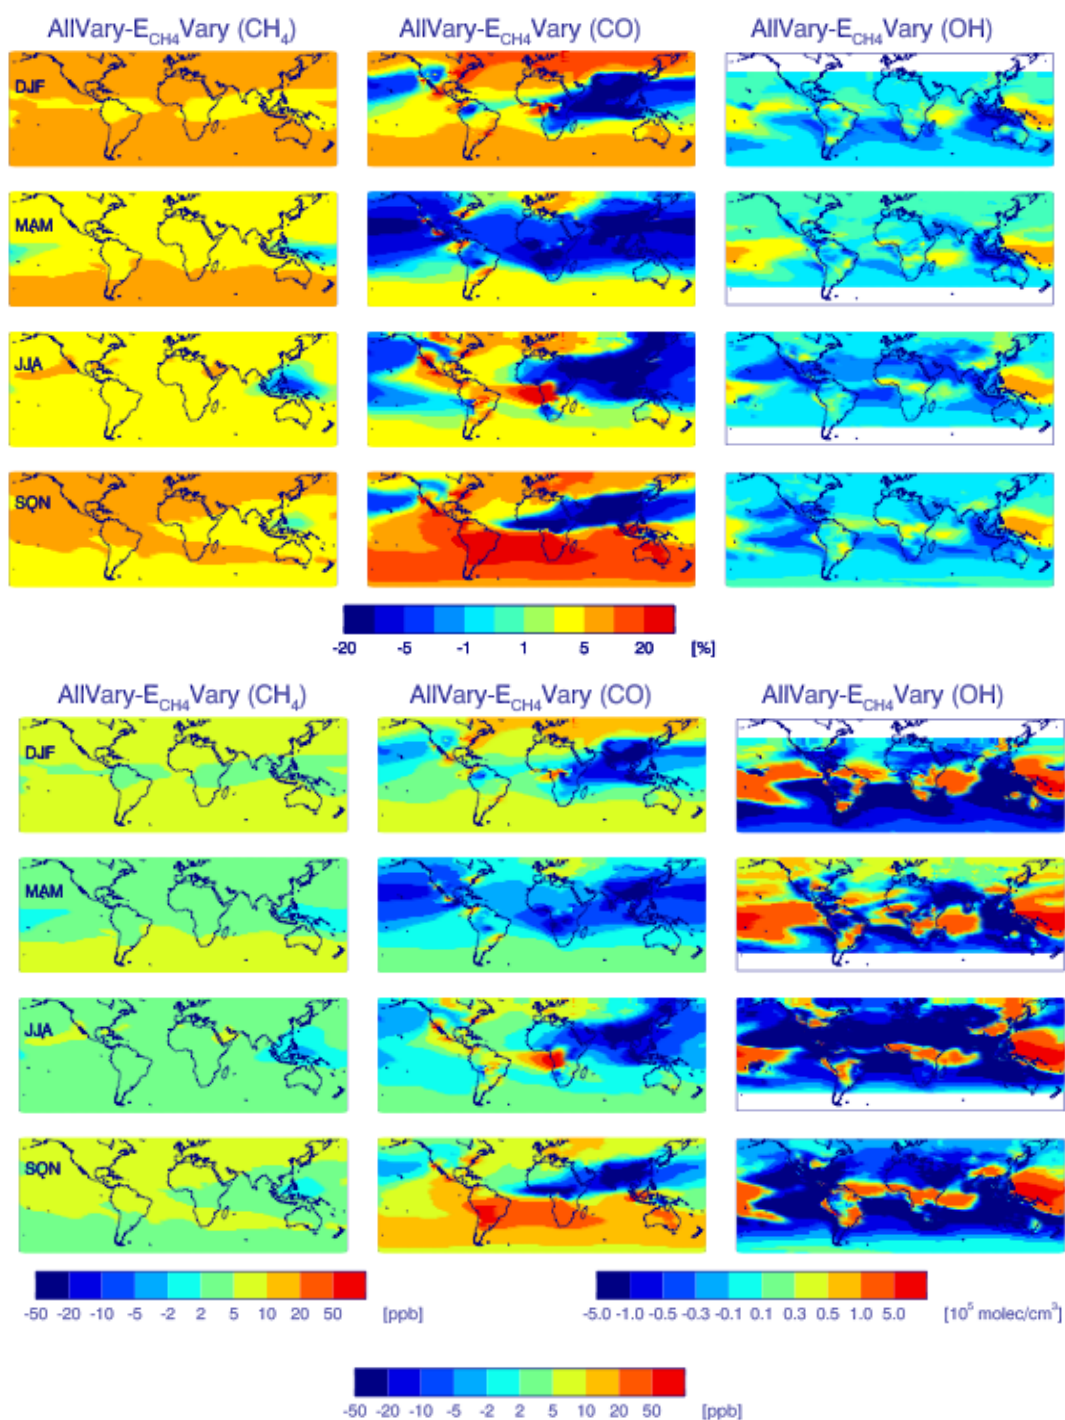

Figure S 23: Relative (%; upper panels) and absolute (lower panels) differences of seasonal, tropospheric methane (ppbv), CO (ppbv), and OH ( $\times 10^5 \text{ molecules/cm}^3$ ) between the *AllVary* and *E<sub>CH4</sub>Vary* scenarios.
